# Active reconfiguration of cytoplasmic lipid droplets governs migration of nutrient-limited phytoplankton

Anupam Sengupta<sup>1†\*</sup>, Jayabrata Dhar<sup>1†</sup>, Francesco Danza<sup>1‡</sup>, Arkajyoti Ghoshal<sup>1‡</sup>, Sarah Müller<sup>1,2</sup>  
and Narges Kakavand<sup>1</sup>

<sup>1</sup>Physics of Living Matter, Department of Physics and Materials Science, University of Luxembourg, 162A, Avenue de la Faiënerie, 1511 Luxembourg City, Luxembourg

<sup>2</sup>Swiss Nanoscience Institute, University of Basel, 82, Klingelbergstrasse, 4056 Basel, Switzerland

\* To whom correspondence may be addressed: [anupam.sengupta@uni.lu](mailto:anupam.sengupta@uni.lu)

† A.S and J.D contributed equally to this work

‡ F.D. and A.G. contributed equally to this work

**Short title: Active lipid droplets regulate biomechanics of microbial swimming**

**One sentence summary:** Phytoplankton harness reconfigurable lipid droplets to biomechanically tune migratory strategies in dynamic nutrient landscapes.

**Acknowledgements:** The authors thank Gea Guerriero for supporting with the cell culture facility during initial phase of the project, and Nicolas Tournier for assisting with the fabrication of the millifluidic setup.

**Funding:** This work was supported by the ATTRACT Investigator Grant (Grant no. A17/MS/11572821/MBRACE), the PRIDE Doctoral Training Unit (project PRIDE19/14063202/ACTIVE), and the AFR Grant (Grant no. 13563560) of the Luxembourg National Research Fund. The work received generous support from the Human Frontier Science Program Cross Disciplinary Fellowship (to J.D., LT000368/2019-C), and the Swiss National Science Foundation Early Postdoc Mobility (to F.D., project number: P2GEP3\_184481).

**Author Contributions:** A.S. conceptualized and developed the research plan, and directed all parts of the project. A.S., J.D., F.D., A.G., S.M., and N.K. carried out experiments and analyzed data. J.D and A.S. set up the single-cell biomechanics and population-level migration model. J.D. carried out computations and compiled the phase maps with directions from A.S. J.D., F.D, and A.G. carried out the statistical tests. A.S. and J.D. prepared figures with support from F.D. and A.G. A.S. and J.D. wrote the paper with inputs from all authors.

**Competing interests:** Authors declare no competing interests.

**Data and materials availability:** Data and codes are available in the main text, or upon requests made to the corresponding author.

**Keywords:** phytoplankton, nutrient limitation, cytoplasmic lipid droplets, active reconfiguration, vertical migration, morphology, photophysiology, ROS

## 37 **Abstract**

38 As open oceans continue to warm, modified currents and enhanced stratification exacerbate nitrogen and  
39 phosphorus limitation, constraining primary production. The ability to migrate vertically bestows motile  
40 phytoplankton a crucial—albeit energetically expensive—advantage toward vertically redistributing for optimal  
41 growth, uptake and resource storage in nutrient-limited water columns. However, this traditional view  
42 discounts the possibility that the phytoplankton migration strategy may be actively selected by the storage  
43 dynamics when nutrients turn limiting. Here we report that storage and migration in phytoplankton are  
44 coupled traits, whereby motile species harness energy storing lipid droplets (LDs) to biomechanically  
45 regulate migration in nutrient limited settings. LDs grow and translocate—directionally—within the cytoplasm  
46 to accumulate below the cell nucleus, tuning the speed, trajectory and stability of swimming cells. Nutrient  
47 reincorporation reverses the LD translocation, restoring the homeostatic migratory traits measured in  
48 population-scale millifluidic experiments. Combining intracellular LD tracking and quantitative  
49 morphological analysis of red-tide forming alga, *Heterosigma akashiwo*, along with a model of cell  
50 mechanics, we discover that the size and spatial localization of growing LDs govern the ballisticity and  
51 orientational stability of migration. The strain-specific shifts in migration which we identify here are  
52 amenable to a selective emergence of mixotrophy in nutrient-limited phytoplankton. We rationalize these  
53 distinct behavioral acclimatization in an ecological context, relying on concomitant tracking of the  
54 photophysiology and reactive oxygen species (ROS) levels, and propose a dissipative energy budget for  
55 motile phytoplankton alleviating nutrient limitation. The emergent resource acquisition strategies, enabled by  
56 distinct strain-specific migratory acclimatizing mechanisms, highlight the active role of the reconfigurable  
57 cytoplasmic LDs in guiding vertical movement. By uncovering the mechanistic coupling between dynamics  
58 of intracellular changes to physiologically-governed migration strategies, this work offers a tractable  
59 framework to delineate diverse strategies which phytoplankton may harness to maximize fitness and resource  
60 pool in nutrient-limited open oceans of the future.

## 61 **Introduction**

62 Oceans, today, are undergoing a major makeover due to the warming temperatures and perturbation of the  
63 currents, impacting the concentrations and availability of key nutrients across scales (1–3). High  
64 temperatures promote stratification of the ocean column, exacerbating nutrient limitation in tropical and mid-  
65 latitude surface waters (4, 5). Together with the increased concentration of atmospheric carbon dioxide that  
66 trigger indirect changes of the surface water chemistry (1), the limitation of nitrate ( $\text{NO}_3^-$ ), phosphate ( $\text{PO}_4^{3-}$ ),  
67 and iron has impacted primary productivity in vast swathes of open oceans (6). The restructuring of the  
68 mixed layer depth exert critical control on the vertical distribution of phytoplankton (7, 8), and associated  
69 community scale structure and interactions (9–11). Nutrient limitation, an inescapable fate of future oceans,  
70 is projected to continue amplifying uninterrupted, mediated by nutrient trapping (5), stronger stratification  
71 (12), and co-limitation of one nutrient by another limiting nutrient (13, 14), with far-reaching ramifications  
72 on all major marine ecosystems (2, 4, 5).

73 Phytoplankton, key photosynthetic microorganisms occupying the base of nearly all aquatic food webs,  
74 acclimatize in the emerging nutrient landscapes by repositioning along the vertical column (11, 15–18),  
75 aided by a range of coping mechanisms, both behavioral and physiological. Under diffusion-limited settings,  
76 the temporal nature (stable vs time-varying limitation), specificity of nutrient affinity, and species-specific  
77 allometries of uptake, maximal growth rates and nutrient storage, vary along the ocean column (2, 19–22).  
78 Altered cell size (23), enhanced nutrient affinity (24), higher stoichiometric plasticity (25), and adjusted  
79 energy storage capacity (26–28), are among critical trait shifts which allow phytoplankton to redistribute  
80 along the ocean depths to maximize fitness. High nutrient affinity alongside low storage capacity offer  
81 competitive advantage to small-sized cells exposed to steady or frequently-pulsed low nutrient  
82 concentrations, while larger sizes are beneficial in oligotrophic waters if the cellular nutrient quota remains

83 steady, as evidenced in vacuolated phytoplankton (29). Complementarily, maintaining a steady size can be  
84 advantageous for cells which can maximize nutrient affinity by down-regulating metabolically expensive  
85 processes, or by replacing key elements by widely-available surrogate elements in costly nutrient-specific  
86 cellular processes (14, 30, 31).

87 The ability to migrate, either by swimming or by buoyancy regulation, allows phytoplankton a critical access  
88 to nutrient-rich patches, as well as increase the flux of nutrient molecules (relative to pure diffusion), thus  
89 enhancing the competitive advantage to migrating species under low nutrient settings (21, 32, 33).  
90 Leveraging migration along the vertical ocean column, phytoplankton may explore a viable acclimatization  
91 alternative to the non-migratory trait shifts, provided the benefits outweigh the energetic costs. Whether a  
92 population migrates to optimize its resource searching strategy under nutrient constraints is contingent to the  
93 stored energy levels, along with the individual uptake capabilities should there be chanced encounters with  
94 ephemeral nutrient patches (34, 35).

95 Energy-rich lipid and starch bodies allow phytoplankton to maintain fitness by gradual utilization of the  
96 stored resources (26–28). Over prolonged durations of nutrient limitation, heavier, short-lived starch bodies  
97 transform into lighter cytoplasmic lipid droplets (LDs). Though LD synthesis and maintenance come at the  
98 cost of immediate growth and division, LDs facilitate key metabolic processes during nutrient limitation,  
99 including crucially, amelioration of physiological stress (36–38). Larger storage capacity is potentially  
100 beneficial when nutrients are scarce (39, 40), however migration can offset competitive advantages  
101 therefrom by enhancing encounters and expanding the available resource pool (35).  $\text{NO}_3^-$  depletion has been  
102 associated with the initiation of diel vertical migration during red tides (41, 42), enabling *Heterosigma*  
103 *akashiwo* access to the dissolved nutrients below the thermocline (43), yet contrasting observations with  
104 other species have indicated inverse correlations of lipid volume and phytoplankton motility (44–46). The  
105 jury is thus still out on the mechanistic links between cell-level LD dynamics and population-scale migratory  
106 shifts. The emerging conundrum that nutrient-limited phytoplankton face—in risking fitness due to limited  
107 growth and division, while enhancing migration-driven nutrient encounters—relies on the dynamics of storage  
108 and utilization of the energy-rich bodies. Yet how phytoplankton arrive at an optimal storage-and-migration  
109 strategy, a critical coupled trait, remains unknown.

110 Here we report that motile phytoplankton under nutrient limitation harness energy-rich cytoplasmic LDs to  
111 govern their migratory behaviour, expanding their resource pool and acquisition strategies. Using strains of  
112 *Heterosigma akashiwo*—a model gravitactic raphidophyte known for their toxic blooms (33, 47) and rapid  
113 adaptability (48, 49)—we show that cytoplasmic LDs nucleate as scattered droplets when concentrations of  
114  $\text{NO}_3^-$  and  $\text{PO}_4^{3-}$  in the cell culture drop below a threshold value. Growth stages in our cell cultures, a proxy of  
115 ecologically relevant nutrient levels, trigger augmentation of LD size, followed by droplet merging and  
116 reduction in their count. Simultaneously, the expanding LDs translocate—directionally—through the cytosol  
117 to accumulate below the cell nucleus, triggering progressive modification of the ballisticity and stability of  
118 the swimming cells. We develop a data-based model of cell mechanics that establishes a mechanistic link  
119 between the LD dynamics and phytoplankton migration in nutrient limitation, elucidating the role of LD size  
120 and intracellular position in precisely governing the migratory behaviour. Nutrient reincorporation reverses  
121 the LD translocation restoring the swimming properties, highlighting an active control of phytoplankton  
122 migration by reconfiguration of the LDs. Together with observations of cellular stress levels,  
123 photophysiological performance, and selective switching to mixotrophy, our results point to an LD-governed  
124 migratory adaptation of phytoplankton under nutrient limitation, in a manner that accounts for the strain-  
125 specific differences we observe in the modified swimming strategies. We argue, using a dissipative energy  
126 budget, that storage and migration diversify as coupled traits in motile phytoplankton under nutrient  
127 limitation, allowing them to harness LDs biomechanically to regulate migration, thereby expanding the

128 resource pool and diversifying the nutrient acquisition strategy. The amenable trade-offs between cellular  
129 behaviour and physiology we report here may ultimately equip species to maximize fitness in changing  
130 nutrient landscapes of future oceans.

## 131 **Results**

132 We track the growth and translocation of cytoplasmic LDs in two different strains of *H. akashiwo*,  
133 CCMP3107 and CCMP452 (hereafter strains S-1 and S-2 respectively) using cell-level quantitative imaging,  
134 alongside spectrophotometry to measure the concentrations of  $\text{NO}_3^-$  and  $\text{PO}_4^{3-}$  in the liquid cell cultures  
135 (Figure 1A, Methods).  $\text{PO}_4^{3-}$  depletion occurred faster, within  $\sim 125$  h of inoculation, corresponding to the  
136 exponential growth stage, while  $\text{NO}_3^-$  levels deplete below detectable values over a much longer period ( $t$   
137  $\sim 225$  h, coinciding with the transition to stationary growth stage). The yellow-orange regions, initially  
138 scattered across the cytosol, represent intracellular LDs in S-1 (false-colour epifluorescence micrographs,  
139 Figure 1A, Methods), undergo significant growth as the  $\text{NO}_3^-$  availability drops to  $C \sim 0$   $\mu\text{M}$ , 225 h after cells  
140 were freshly inoculated with  $C_0 = 600$   $\mu\text{M}$  of  $\text{NO}_3^-$  ( $\sim 165$  pmole/cell). LDs do not nucleate till  $t \sim 200$  h  
141 (Figure 1B), suggesting it is the sustained limitation of  $\text{NO}_3^-$ , and not  $\text{PO}_4^{3-}$ , that drives the growth of the  
142 LDs (50). Over the course of population growth, the cell area increases, reaching a maximum at the onset of  
143 the stationary growth stage ( $\sim 180$   $\mu\text{m}^2$  at  $t = 396$  h), coinciding with  $\sim 0$   $\mu\text{M}$  availability of  $\text{NO}_3^-$ . Thereafter  
144 the cell size reduces as the population enters the late stationary stage ( $t > 700$  h). Correspondingly, the size of  
145 the LDs relative to the cell size,  $I_{LD}$  ( $I_{LD} = \text{total lipid area/cell area}$ ), increases as the  $\text{NO}_3^-$  availability drops,  
146 showing a significant enhancement when the population enters the stationary growth stage (ANOVA:  $P <$   
147  $0.001$ ; asterisk presents statistical difference in the lipid volume,  $V_{LD}$ , inset Figure 1B). During the transition  
148 into the stationary growth stage ( $228$  h  $< t < 300$  h),  $V_{LD}$  increases 270%, at a rate of  $0.12$   $\mu\text{m}^3/\text{h}$ , thereafter  
149 maintaining a stable volume of  $\sim 20$   $\mu\text{m}^3$  into the late stationary stage ( $I_{LD} \sim 0.07$  during the same period).  
150 Beyond  $t > 800$  h, though  $V_{LD}$  remains stable (inset Figure 1B),  $I_{LD}$  increases further due to the reduction in  
151 the cell size, underscoring the simultaneity of distinct trait shifts—accumulation of energy-rich LDs and  
152 enhancement of the surface-to-volume ratio—in nutrient depleted populations (23).

153 Phytoplankton regulate LD biosynthesis dynamically as the nutrient availability changes. Populations  
154 inoculated with lower initial nutrient concentration produced LD more rapidly ( $0.09$   $\mu\text{m}^3/\text{h}$  in 1%  $C_0$  vs  $0.076$   
155  $\mu\text{m}^3/\text{h}$  in control condition), though their LD carrying capacity, *i.e.*, the maximum volume of LD generated  
156 per cell, was lower compared to the control case (with 1%  $C_0$ ,  $V_{LD} \sim 10$   $\mu\text{m}^3 < 22$   $\mu\text{m}^3$  for the control  
157 population). The reduced initial nutrient concentration, additionally, lowered the cell count over the entire  
158 growth stage, while enhancing the rate at which the cell size increases during the early exponential stage by  
159 nearly 45%. Logistic fitting of the LD volume per cell reveals that lipid accumulation ceases during the  
160 stationary growth stage, indicating phytoplankton do not consume LDs at the corresponding timescales.  
161 Taken together, our results demonstrate that, phytoplankton can adapt cell growth to accommodate the lipid  
162 yield and production rate dynamically, in face of evolving nutrient limitation. A steady reserve of energy-  
163 rich LD, despite the nutrient-poor settings, may equip cells biophysically to secure immediate competitive  
164 advantages (44, 45, 51, 52), while preserving essential molecules for the maintenance (or modification) of  
165 behavioural and physiological traits over much longer timescales.



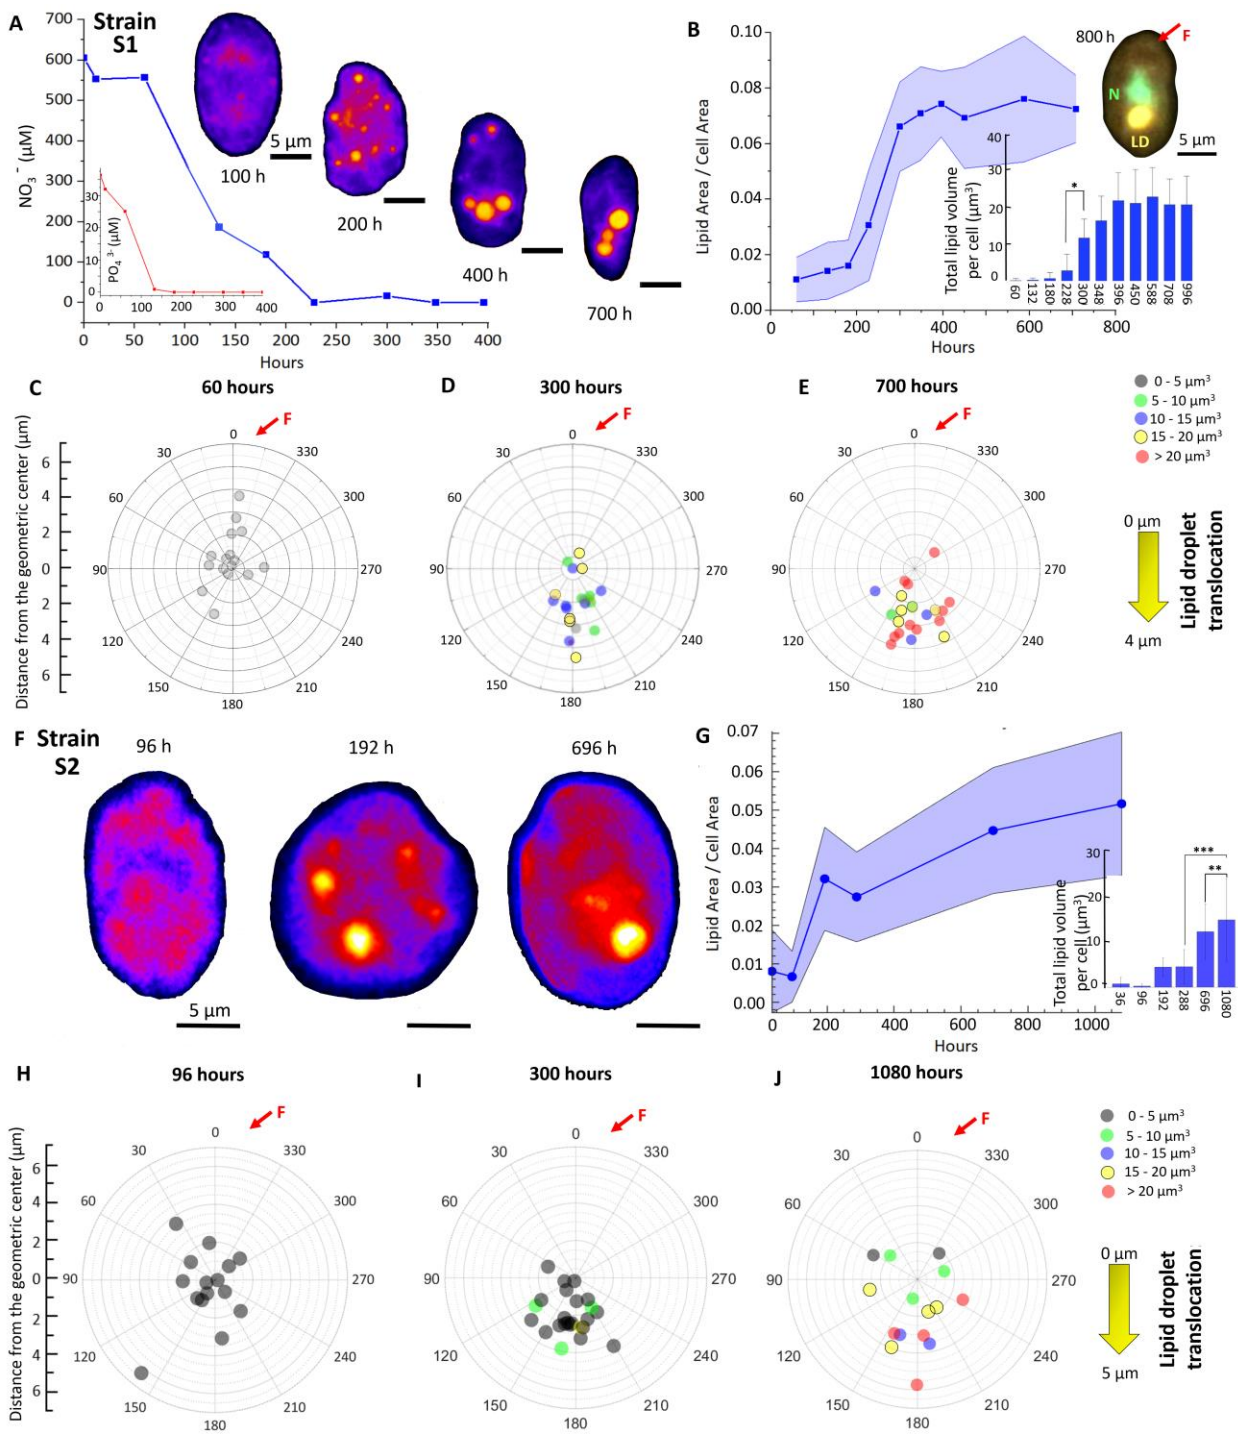

166

167 **Figure 1. Nutrient depletion triggers cytoplasmic lipogenesis and lipid droplet translocation in**  
 168 **phytoplankton.** (A) Lipid droplet (LD, bright orange false-colour epifluorescence signal) nucleation, growth and  
 169 translocation over time, triggered due to diminishing concentrations of  $\text{NO}_3^-$  and  $\text{PO}_4^{3-}$  (inset) in S-1 culture. Small LDs,  
 170 scattered throughout the cytosol, are first visualized at 200 h after cell inoculation, as the population enters the late  
 171 exponential growth stage. With the nutrient concentrations depleting further, reaching values below the detection limit  
 172 of the spectrophotometer, the cell culture reaches its carrying capacity. In this nutrient depleted setting, the number of  
 173 LDs per cell reduce, however the LDs grow significantly in size, and translocate within the cytosol, ultimately  
 174 localizing below the cell nucleus, as visualized in panel B (top inset). (B) The normalized lipid size,  $I_{LD}$  ( $I_{LD}$  = total lipid  
 175 area/cell area), increases steeply as the population enters early stationary growth stage (200 h -350 h), and thereafter  
 176 remains stable ( $I_{LD} \approx 0.07$ ) through the late stationary stage, before going up again after  $t = 800$  h during which the cell  
 177 reduces in size while the LD maintains a constant dimension. Squares and shaded regions denote mean  $\pm$  s.d. of  
 178 analyzed cells ( $t_{60} = 20$ ,  $t_{132} = 20$ ,  $t_{180} = 21$ ,  $t_{228} = 21$ ,  $t_{300} = 25$ ,  $t_{348} = 30$ ,  $t_{396} = 21$ ,  $t_{450} = 23$ ,  $t_{558} = 24$ ,  $t_{708} = 22$ ). Top inset:  
 179 A multichannel fluorescent micrograph shows localization of the LD (yellow-orange hue) below the nucleus (N, light

180 green hue) in a nutrient-limited phytoplankton ( $t = 800$  h). The relative location of the propelling flagellum ( $F$ ) is  
181 indicated by the red arrow head. The bottom inset presents the  $V_{LD}$ , the total lipid volume (sum of single LD in each  
182 cell) per cell, over time as a bar plot of the mean  $\pm$  s.d.; ANOVA:  $P < 0.001$ ; asterisk indicates significant difference in  
183  $V_{LD}$  between  $t = 228$  h and  $t = 300$  h.  $V_{LD}$  remains stable at  $\sim 20 \mu\text{m}^3$  through all  $t > 400$  h time points measured here. (C-  
184 E) Spatio-temporal coordinates of the effective LD in individual S-1, relative to the geometric center (or the center of  
185 buoyancy,  $C_B$ ) located at the center of the angular plot.  $C_B$  coincides with the cell nucleus and thus, with the cell's  
186 center of gravity ( $C_G$ ). Tracking the effective LDs over time captures the intracellular translocation with depleting  
187 nutrients, i.e., with increasing age of the phytoplankton culture, over  $t = 60$  h (C), 300 h (D), 700 h (E) respectively.  
188 The effective LD size, angular position, and the radial offset distance from  $C_B$  are obtained in individual cells, with their  
189 long axis indicated by the  $0^\circ$ - $180^\circ$  line (fore-aft direction). The fore and aft directions are distinguished by the position  
190 of the propelling flagellum located on the fore-end of the cell, slightly offset from  $0^\circ$  (shown as red arrow head,  $F$ ). As  
191 indicated by the color-coded circles, the effective LD progressively moves toward larger size ranges, simultaneously  
192 translocating in the aft direction (away from the flagellum) with increasing radial offset from  $C_B$ . (F) LD biogenesis and  
193 localization in S-2, shown here for  $t = 96$  h, 192 h, 696 h. (G) The S-2  $I_{LD}$  shows an increasing trend through the entire  
194 growth stage studied here (till  $t = 1080$  h), reaching a maximum value of  $I_{LD} = 0.052 \pm 0.018$ . Inset: Time series of  $V_{LD}$   
195 for S-2 shows a significant increase from  $t = 288$  h, as the cell culture reaches carrying capacity. t-test between 696 h  
196 and 1080 and one-way ANOVA between 288 h, 696 h and 1080 h,  $p < 0.001$ ; asterisks indicate statistically significant  
197 difference. (H-J) Spatio-temporal coordinates of the effective LD in individual S-2 at  $t = 96$  hours (H), 288 hours (I),  
198 696 hours (J) reveal the growing size of effective LDs and concomitant aft-ward translocation of LDs over prolonged  
199 nutrient depleted conditions (see caption for panels C-E for quantification steps). Throughout the figure, the time axis  
200 and values denote the duration elapsed since the start of a fresh inoculum (nutrient replete condition), signifying the  
201 nutrient corresponding availability.

202 As nutrient limitation persists, isolated LDs merge to form larger droplets, reducing their total count per cell.  
203 The enhancement of the effective lipid volume (Figure 1B, Methods) is accompanied by directed  
204 cytoplasmic translocation of the LDs away from the fore-end of the cell, ultimately accumulating below the  
205 cell nucleus. Inset Figure 1B (multichannel fluorescent image) captures the position of the LD, relative to the  
206 cell nucleus ( $N$ ), and the propelling flagellum ( $F$ ). Since the position of the nucleus ( $C_N$ , Figures M1)  
207 coincides with the center of buoyancy,  $C_B$ , or the geometric center of the cell in an LD-free state, the center  
208 of gravity and the geometric center overlap. The center of gravity, obtained by weighted average of the  
209 lipid, nucleus and cytoplasmic areas in the cell. Using  $C_B$  as the center of wind rose plots (Figures 1C-E), we  
210 track the radial and angular coordinates of the cytoplasmic LDs over time ( $C_L$ ). During the early exponential  
211 stage (Figure 1C), the LDs are miniscule in size ( $V_{LD} < 5 \mu\text{m}^3$ ), distributed unspecifically between both the  
212 top-half and the bottom-half of the cytoplasm. Due to their small size, and close proximity to the geometric  
213 center (short  $L_L$ , Figure M1), LDs do not alter the orientational stability of cells (Methods, Figures 3 and 4).  
214 However, during the stationary stage, higher LD volumes ( $5 \mu\text{m}^3 < V_{LD} < 20 \mu\text{m}^3$ ), combined with  
215 predominant localization below the cell nucleus, modify the center of gravity of the cells (Figure 1D). Larger  
216 LDs, placed further away from the geometric center of the cell, increase the offset distance of the LDs,  $L_L$ ,  
217 thereby altering the separation between the geometric center and the effective center of gravity. A shift in the  
218 offset length generates rotational moments (Figure 4), biomechanically modifying the orientational stability  
219 of swimming cells (48). Over the course of the stationary stage, progressive accumulation of LDs, with  
220 specific gravity ( $\sim 0.9$ ) lower than the surrounding cytosol ( $\sim 1.05$ ), relocates cells' center of gravity above the  
221 geometric center, i.e., toward the upper half of the cell (Figures 1C-E, Figure M1). The new coordinates of  
222 the center of gravity is underpinned by the LD size and the offset length. Since LDs are lighter than the  
223 cytosol their intracellular mobility along the gravity vector (i.e., against the direction of phytoplankton  
224 migration, Figure 3A, B) suggests that cytoplasmic translocation is not a passive gravity-mediated process,  
225 but rather an active process. During the late stationary stage, LDs do not translocate further (Figures 1D, E),  
226 however their growth relative to the cell size, generates stronger rotational moments, with far-reaching  
227 impact on the migratory properties (Figures 3 and 4).

228 A similar trend is observed for S-2, however with different LD growth and translocation dynamics (Figure  
229 1F-J). Compared to S-1, the normalized lipid size,  $V_{LD}$ , shows an increasing trend even into late stationary  
230 stages (Figure 1G), due to increasing lipid volumes (inset, Figure 1G), and relatively stable cell sizes. Akin

231 to S-1, the LDs translocate progressively below the nucleus, as captured in the wind rose plots in Figures 1H-  
232 J. It might be worthwhile to mention here that the nucleus of S-2 is located above the geometric center of the  
233 cell (48), thus making the center of gravity slightly higher than the geometric center of the cell (top heavy) in  
234 the LD-free state. As LDs grow and translocate below the cell nucleus, the effective center of gravity moves  
235 lower, reducing its separation from  $C_B$ . In summary, both S-1 and S-2 elicit growth and translocation of LDs,  
236 however maintaining strain-specific differences in the LD growth rates ( $0.0895 \mu\text{m}^3/\text{h}$  for S-1 vs  $0.044 \mu\text{m}^3/\text{h}$   
237 for S-2), intracellular translocation speeds (at  $0.005 \mu\text{m}/\text{h}$  for S-1 vs  $0.0033 \mu\text{m}/\text{h}$  for S-2), and cell size  
238 modifications, allowing for selective regulation of swimming characteristics in a strain-specific manner.

239 Reincorporation of nutrients into the depleted cell cultures reconfigures the LD growth and translocation  
240 dynamics. Within  $\sim 10$  h of nutrient reincorporation, LDs shrink in size, and thereafter break down into  
241 droplets of smaller sizes. The lysed droplets now translocate in the reverse direction, moving toward the  
242 fore-end of the cell, ultimately disappearing within the course of the population doubling time (Figures 2).  
243 The cell size does not alter during lipolysis (Figure 2A), while the freshly lysed smaller droplets continue  
244 dispersing across the cytosol (false color fluorescent micrographs, Figure 2A). Quantifying the LD size, we  
245 find that the net lipid volume per cell drops significantly between 10 h and 24 h (Figure 2B) (stat given in the  
246 caption already), finally reducing to  $\sim 5 \mu\text{m}^3$  within  $\sim 35$  h post reincorporation, *i.e.*, within the doubling time  
247 of the population (specific exponential growth rates for S-1 and S-2 are 0.66/day and 0.4/day respectively, in  
248 agreement with previous studies (48). With  $\sim 50\%$  of the cells retaining  $V_{LD}$  below  $5 \mu\text{m}^3$  after  
249 reincorporation (Figure 2E), at a population level, the S-1 elicits a higher diversity of cells having lipids. The  
250 reversed translocation of LDs toward the fore-half of the cell (Figures 2C-E), consequently shifts the center  
251 of gravity back at the geometric center of the cell. The rate of LD lipolysis, tunable by the concentration of  
252 the nutrients reincorporated, is considerably faster than that of lipogenesis (Methods). Lipolysis in S-2 is  
253 more rapid, with significant reduction of the cellular lipid within the first 6 h -10 h of nutrient  
254 reincorporation (Figures 2F, G). Within  $\sim 35$  h, the LDs reduce by 97% of the initial  $V_{LD}$  ( $V_{LD} < 5 \mu\text{m}^3$ ),  
255 within 80% of all the cells chosen randomly (Figures 2H-J), thus eliciting a uniform, low diversity  
256 population compared the S-1. The reconfigurability of the LDs—both in size and spatial localization—confirm  
257 that cytoplasmic translocation of LDs is an active process driven by the nutrient availability in the local  
258 environment. While strain-specific differences are noted (and contextualized in following sections), for  
259 instance lipolysis in S-1 is slower than in S-2, and that a fraction of the S-1 population retains LDs even after  
260 reincorporation, in contrast to S-2, overall both strains manifest an active nutrient-controlled growth and  
261 spatio-temporal dynamics of intracellular lipid droplets.

262



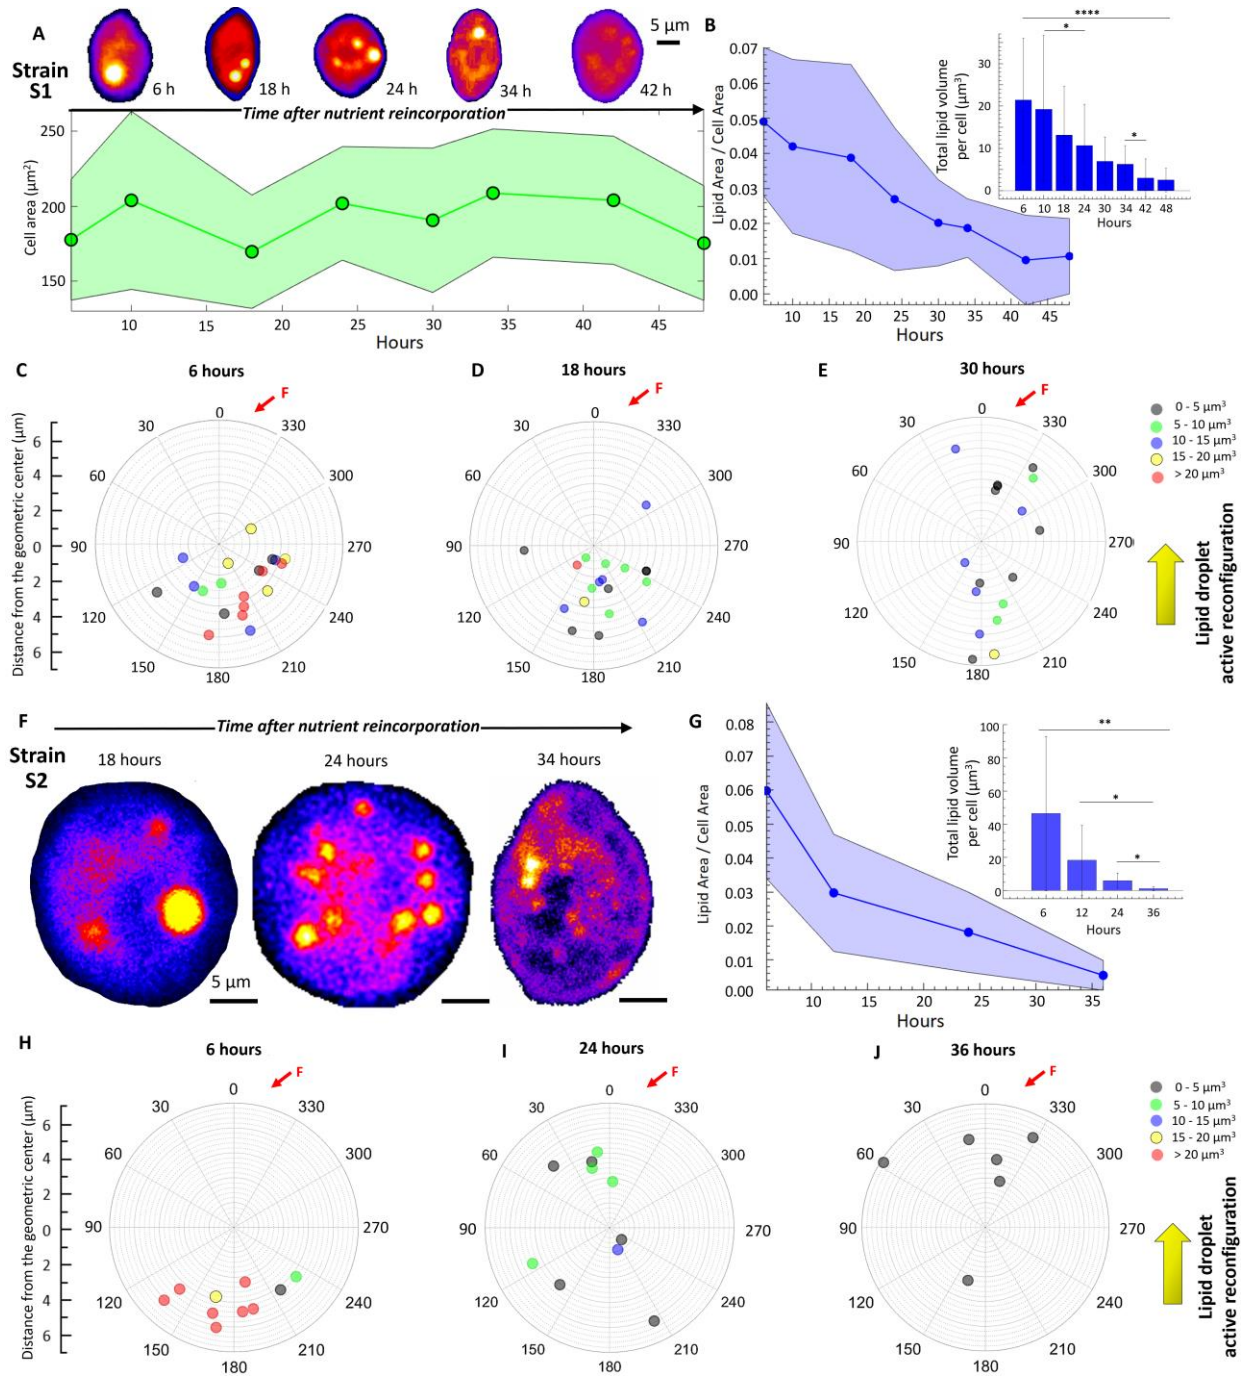

263

264 **Figure 2. Active reconfiguration of LDs upon nutrient reincorporation.** (A) Rapid lipolysis of cytoplasmic  
 265 LDs (bright spots) in S-1 upon reincorporation of nutrients in the cell culture. The cell area remains nearly constant  
 266 across the observed time window. Shown here using false color fluorescent micrographs, within 18 h of reincorporation,  
 267 large LDs break down into smaller droplets while reducing in size, before disappearing at  $t = 48$  h. The lysed and  
 268 shrinking LDs actively translocate from the aft-to-fore direction (bottom to top), in opposite sense of the growing LDs  
 269 under nutrient-limited conditions. (B) The index of lipid size,  $I_{LD}$  ( $I_{LD} = \text{total lipid area}/\text{cell area}$ ), reduces from  $0.049 \pm$   
 270  $0.021$  just prior to reincorporation, to  $0.01 \pm 0.01$  at  $t = 48$  h. Inset shows the reduction in the total LD volume per cell,  
 271  $V_{LD}$ , over time after nutrient addition. One-way ANOVA between 10 h, 18 h and 24 h, t-test between 34 h and 42 h,  $p <$   
 272  $0.001$ ; asterisks indicate statistically significant difference. (C-E) Spatio-temporal coordinates of the effective LD in  
 273 individual S-1 cells after nutrient reincorporation, measured relative to the geometric center ( $C_B$ ). Effective LD size in  
 274 each cell reduces, and the intracellular positions are shown for  $t = 6$  h (C), 18 h (D), and 30 h (E) respectively. An  
 275 active translocation of LDs can be seen from the bottom to the top of the cell (indicated by the flagellar position, F). (F)  
 276 False color micrographs of S-2 reveal lipolysis, and LD size reduction due to nutrient reincorporation, alongside active  
 277 translocation of the LDs in the aft-to-fore direction. (G)  $I_{LD}$ , the total lipid area/cell area, reduces from  $0.06 \pm 0.025$   
 278 prior to reincorporation, to  $0.005 \pm 0.004$  at  $t = 36$  h. Inset shows the reduction in the total LD volume per cell,  
 279  $V_{LD}$ , over time after nutrient addition. One-way ANOVA between 12 h, 24 h and 36 h, t-test between 24 h and 36 h,  $p <$



280 0.001; asterisks indicate statistically significant difference. **(H-J)** Coordinates of effective LDs relative to the geometric  
281 center at  $t = 6$  hours **(H)**, 24 hours **(I)**, 36 hours **(J)** respectively capture the active reconfiguration of the LDs due to  
282 nutrient reincorporation.

283 The migratory behavior under nutrient limitation is strain-specific, emerging concurrently with  
284 commensurate alterations in physiological and trophic traits (Figures 3). By mapping the swimming  
285 properties with the intracellular lipid attributes at corresponding time points, we uncover mechanistic links  
286 between the LD dynamics and the ballisticity and orientational stability of nutrient-limited cells (Figure 4).  
287 For S-1 (Figure 3A-F), the swimming speed,  $V (= [V_x^2 + V_y^2]^{0.5}$ ,  $x$  and  $y$  indicate directions perpendicular and  
288 parallel to the gravity vector,  $\mathbf{g}$ , respectively), quantified within custom-built millifluidic chambers (Figure  
289 M2, Methods), is progressively arrested as nutrient concentration drops, triggering emergence of a distinct  
290 sub-population with reduced motility (Figure 3A-C). The relative proportion of low motility swimmers  
291 increases as the population enters late stationary stage, captured in the joint velocity distribution (at  $t = 100$  h  
292 and 700 h, Figure 3E, inset). The rapidity with which a nutrient-depleted population switches to low motility  
293 regime depends on the initial nutrient availability (Figure 3A, inset): in the control case (initial concentration  
294  $C_0$ ), the sub-population appears at  $200 \text{ h} < t < 250 \text{ h}$  (Figure 3C), while for the populations inoculated with  
295 10%  $C_0$  and 1%  $C_0$ , low motility sub-population appeared within  $100 \text{ h} < t < 150 \text{ h}$  (Figure 3A). The drop in  
296 the swimming speed, specifically, occurs due to significant reduction of the vertical swimming speed,  
297 varying from  $140.34 \pm 37 \mu\text{m/s}$  during the exponential stage to  $19.83 \pm 24.47 \mu\text{m/s}$  in late stationary stage,  
298 with the horizontal speed reducing from  $62.96 \pm 20.8 \mu\text{m/s}$  in exponential to  $30.9 \pm 64 \mu\text{m/s}$  in stationary  
299 stage (Figures 3B, 3E (inset)). The broadening of the distribution of swimming direction (Figure 3B),  
300 indicates a shift in the migratory strategy from an anisotropic vertical swimming to enhanced horizontal  
301 movement under nutrient stress (Figures 3B), in line with migratory adjustments due to other stressors,  
302 including temperature (33), light and turbulence (48, 49). Under nutrient limitation, the index of anisotropy,  
303  $I_A (= |V_y/V_x|)$ , drops from 2.1 to 1.32 as the population enters stationary growth stage, synchronizing with the  
304 significant increment of the cytoplasmic lipid volume (Figure 1B). Since  $I_A$  drops more rapidly in cell  
305 cultures inoculated with low initial nutrient concentrations (10% and 1% of  $C_0$ , Figure 3A), an inverse  
306 relation between the vertical motility and the intracellular LD content is concluded.

307  
308 The shift in the swimming traits accompanies commensurate modification of photophysiology and trophic  
309 properties of *H. akashiwo* strains. The population-scale swimming trajectories allow us to extract the mean  
310 squared displacement (MSD) values, signifying the loss of directional swimming and emergence of isotropic  
311 swimming traits (Methods). For S-1, the decrease in the velocity correlation over the physiological growth  
312 stages indicates a progressive shift from ballistic to diffusive swimming trait (Figure 3D, between  $t = 100$  h  
313 to  $t = 700$  h). Concomitantly, the reorientation time,  $\tau_r$ , the characteristic time cells take to rotate back to  
314 equilibrium orientation once perturbed from it (48, 49), increases from  $2.5 \pm 0.5 \text{ s}$  ( $t = 72$  hours) to  $4.7 \pm 1.3$   
315 s ( $t = 700$  hours), confirming reduced orientational stability of the nutrient-limited cells (Figures 3E,  
316 Methods). Overall, the alteration of the migratory properties indicate a concerted shift in the cells' ability to  
317 span the horizontal space under nutrient limitation, suppressing the vertical migration. Together with the  
318 observations of enhanced production of reactive oxygen species (ROS), an indicator of physiological stress  
319 (49), and the reduction of the photosynthetic performance (49, 53), quantified in terms of the photosynthetic  
320 efficiency,  $F_v/F_m$ , and the maximum electron transfer rate,  $ETR_{\text{max}}$  (inset Figure 3D, Methods), we infer that  
321 the migratory shift goes hand-in-hand with modification of the physiological traits. Significant drop in both  
322  $F_v/F_m$ , and  $ETR_{\text{max}}$  was recorded between  $324 \text{ h} < t < 540 \text{ h}$  (the t-test,  $p < 0.001$ ; asterisks indicate  
323 statistically significant difference), which alongside enhanced non-photochemical quenching (NPQ) and  
324 altered migratory behavior, provide hallmarks of an imminent trophic modification. A comparison of the  
325 timelines reveals that the reduction in  $F_v/F_m$  follows LD biogenesis and translocation (Figure 1A, B),  
326 suggesting that the downregulation of the photosynthetic machinery is correlated with the time of the LD-  
327 governed migratory shifts. While the downregulation of photophysiology may serve as an adaptive strategy

328 to conserve energy under nutrient constraints (54), it comes at the cost of reduced growth and cell division,  
329 thus necessitating alternative trophic strategies for survival. Further prolongation of the nutrient limitation ( $t$   
330  $> 800$  h), indeed reveals a switch from photo- to phagotrophic mode of resource acquisition in S-1,  
331 evidenced by the generation of feeding currents (Figure 3F). The bright streaks indicate the trajectories of  
332 bacteria and passive particles within the feeding current, a selection of which is shown with different hues.  
333 The suppression of vertical motility, together with reduced photosynthetic performance and generation of  
334 feeding currents equip cells to shift from photo- to phagotrophy under nutrient limitation, enabling them to  
335 execute basic metabolic functions till inorganic nutrients reappear (54–56).

336  
337 The shifts in motility and trophic strategies are reversed upon spiking the nutrient-depleted cell cultures with  
338 low concentration of fresh nutrient. The uptake of low concentrations of freshly available  $\text{NO}_3^-$  and  $\text{PO}_4^{3-}$   
339 allow nutrient-limited cells to ameliorate physiological stress, recover photophysiology, and enhance vertical  
340 migration. After 24 hours of incubation with nutrients at a concentration  $\sim \frac{1}{8} C_0$ , S-1 showed up to 28%  
341 recovery in the photosynthetic efficiency ( $F_v/F_m$ ), along with partial recovery of the ballisticity and  
342 orientational stability of the cells. The concerted restoration and motility and photosynthetic traits  
343 accompany reduction of ROS levels, suggesting that the population is now primed to execute vertical  
344 migration toward light-rich upper regions in the water column. The recovery of physiological and behavioral  
345 traits, even with a tiny spike in the nutrient concentration, provides motile phytoplankton the crucial ability  
346 to execute vertical migration, and perform photosynthesis to increase fitness.

347  
348 Despite qualitative similarities in the LD biogenesis and cytoplasmic translocation (Figures 1 and 2) of  
349 strains S-1 and S-2, their emerging migratory traits differ considerably. Unlike S-1, cells in S-2 do not show  
350 signatures of a trophic switch to phagotrophy. Both swimming speed and orientational stability increase as  
351 the nutrients turn limiting for S-2 (Figures 3G, H), showing an inverse relation of motility with the nutrient  
352 availability. As the population enters stationary stage, the swimming speed increases from  $89.64 \pm 10.25$  to  
353  $146.41 \pm 30.47$   $\mu\text{m/s}$  over the course of  $240 \text{ h} < t < 430 \text{ h}$ , due primarily to the higher vertical speeds against  
354 gravity (Figures 3G). The velocity correlations increase as the nutrient depletion persists, eliciting a  
355 significant rise as the population enters late stationary stage (from  $t = 430 \text{ h}$  to  $860 \text{ h}$ ), signalling a behavioral  
356 shift from diffusive to ballistic regime (Figures 3H). This, accompanied by significant reduction of the  
357 reorientation time from  $12.5 \pm 5 \text{ s}$  to  $5.11 \pm 2.16 \text{ s}$  (*i.e.*, increased orientational stability, Figures 3E),  
358 represents a migratory switch that allows the S-2 population to swim effectively against gravity and  
359 distribute across the light-rich upper layers of the water column. This is consistent with the higher light  
360 adaptivity of S-2, relative to S-1, reflected by the respective NPQ values: for S-2, the NPQ shows anomalous  
361 change (Figure 4) and throughout the growth stages, remains consistently lower than that of S-1. Though the  
362 photosynthetic efficiency and the electron transfer rate are adversely impacted due to the nutrient limitation  
363 ( $t$ -test between 336 h and 672 h for both  $F_v/F_m$ , and  $ETR_{max}$   $p < 0.001$ ; asterisks indicate statistically  
364 significant difference, Figure 3H, inset), S-2 performs relatively better with their values remain lower than  
365 those in S-1. Taken together, our results indicate that S-1 upregulates the light-protection mechanism to  
366 dissipate excess light energy, whereas S-2 is better light-adapted and attempts to maintain their  
367 photosynthetic performance while waiting for chanced encounters with ephemeral nutrient molecules. The  
368 alteration of migratory properties act synergistically with the photophysiological attributes (high NPQ and  
369 reduced photosynthetic performance), enabling S-2 to position within the upper photic layer, and maximizing  
370 the chances of fitness enhancement through chanced encounters with ephemeral nutrient patches (20, 35).

371

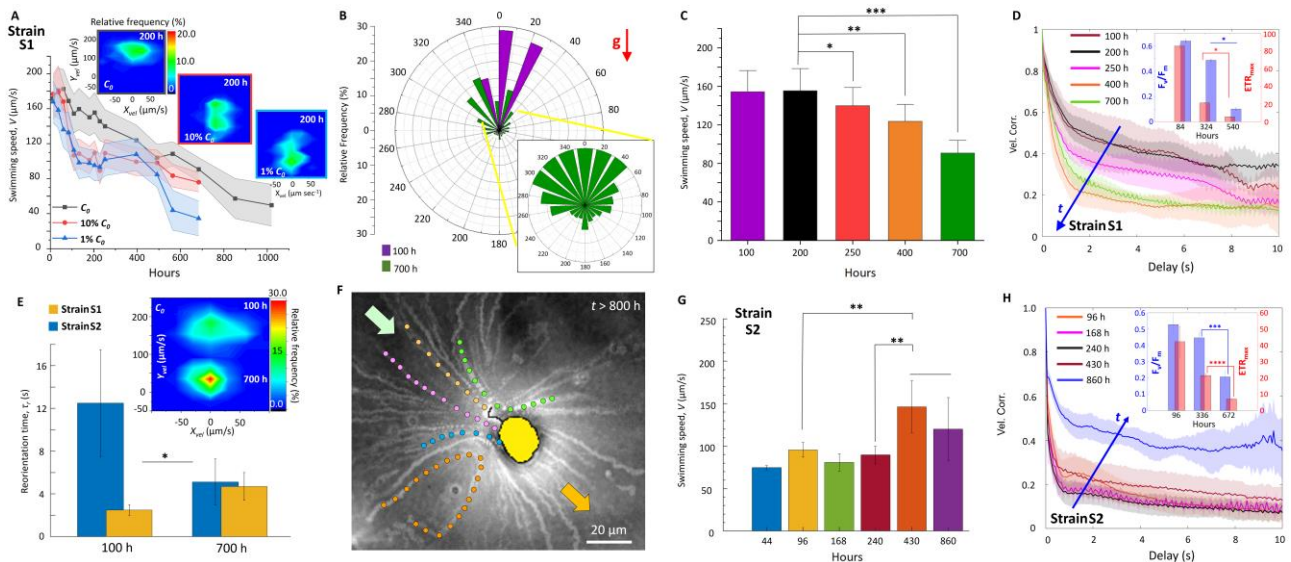

372

373 **Figure 3. Reconfigurable lipid droplets govern migration of nutrient-limited phytoplankton.** (A)  
 374 Evolution of the S-1 swimming speeds spanning the age of the cell culture, with distinct starting nutrient concentrations  
 375 of the inoculum: Control ( $C_0$ , black), 10%  $C_0$  (red), and 1%  $C_0$  (blue). The corresponding shaded regions depict the  
 376 statistical confidence (SD). S-1 exhibits maximum swimming speed during the early exponential growth stage (for each  
 377 starting concentration), and reduces progressively as the culture reaches late exponential and stationary stages. The  
 378 starting nutrient concentration in the cell inoculum determines the rate at which the cell cultures ages (time taken to  
 379 reach the late stationary stage). Inset (left to right): Joint velocity distributions corresponding to 200 h since inoculation  
 380 for starting concentrations  $C_0$ , 10%  $C_0$ , and 1%  $C_0$  reveal emergence of sub-populations with distinct vertical  
 381 migration behavior. (B) Windrose plot captures the swimming directionality of S-1 at  $t = 100$  h (purple) and  $t = 700$  h from the  
 382 start of the control inoculum ( $C_0$ ). The younger cell population exhibits strong anisotropic motility along the vertical  
 383 direction (against the gravity,  $\mathbf{g}$ ), whereas the older cell population loses swimming anisotropy, as revealed by the  
 384 angular spread of the swimming directions. The zoomed-in view of the windrose center captures the emergent migration  
 385 of the older cell population along the gravity direction. (C) Variation of the swimming speed,  $V$ , of S-1 population  
 386 spanning 100 h – 700 h of the control inoculum ( $C_0$ ).  $V$  decreases significantly as the duration under nutrient-depletion  
 387 is extended ( $t > 200$  h). The significant differences (one-way ANOVA,  $p < 0.001$ , post-hoc Tukey's honest significant  
 388 difference) between the exponential ( $t = 100$  h and 200 h), late exponential ( $t = 250$  h) and stationary ( $t = 400$  h and  
 389 700 h) growth stages are observed. The bar plots represent the mean swimming speed  $\pm$  s.d., one asterisk indicates  
 390 statistical significant difference to 100 h and 200 h; at 400 h, two asterisks indicate statistical significant difference  
 391 relative to swimming speeds at 100 h, 200 h, and 250 h. At 700 h, three asterisks indicate statistical significant  
 392 difference to 100 h, 200 h, 250 h and 400 h. (D) S-1 velocity correlations across different time points of the population  
 393 growth. The loss in the velocity correlation signals a shift from ballistic ( $t = 100$  h) to a diffusive ( $t = 700$  h) motility  
 394 regime over the course of the population growth indicated by the arrow head. The inset shows significant reduction of  
 395 the photosynthetic performance concomitantly, measured in terms of the photosynthetic efficiency,  $F_v/F_m$ , and the  
 396 maximum electron transfer rate,  $ETR_{max}$ . t-test between 324 h and 540 h for both  $F_v/F_m$ , and  $ETR_{max}$   $p < 0.001$ ;  
 397 asterisks indicate statistically significant difference. (E) Orientational stability of S-1 population, measured as the  
 398 reorientation time,  $\tau_r$ , at  $t = 100$  h and at  $t = 700$  h. Higher orientational stability corresponds to a lower  $\tau_r$ , i.e.  
 399 faster reorientation back to the stable swimming direction after the population experienced an orientational  
 400 perturbation (see Methods). The bar plot represents mean  $\pm$  s.d., and the asterisk indicates statistical significance  
 401 between the reorientation time of exponential and stationary stages (two sample t-test,  $p < 0.00$ ). Inset: Joint  
 402 velocity distribution captures the relative shift in the vertical velocity component,  $Y_{vel}$ , from  $t = 100$  h to  $t = 700$  h  
 403 in S-1 population. The corresponding horizontal velocity component,  $X_{vel}$ , shows a peak frequency around  $\sim 0$   
 404  $\mu\text{m sec}^{-1}$  for both the time points. (F) Time averaged micrograph obtained from a movie of a phytoplankton  
 405 generating feeding current under nutrient depletion ( $t > 800$  h). The bright streaks indicate trajectories of  
 406 bacteria and passive particles within the feeding current, a selection of which is shown with different hues. The  
 407 loss of vertical motility is accompanied by the generation of feeding current, suggesting a shift from phototrophic  
 408 to phagotrophic foraging mode under nutrient limitation. (G) Swimming speed of S-2 population spanning 44 h –  
 409 430 h of the control cell inoculum. In contrast to S-1, S-2 migrate faster against gravity as the duration under  
 410 nutrient-depletion is extended ( $t > 240$  h). One-way ANOVA between 96 h, 168 h, 240 h and 430 h, t-test  
 411 between 240 h and 430 h,  $p < 0.001$ ; asterisks indicate statistically significant difference. (H) S-2 velocity  
 412 correlation shows an increase with the age of the cell culture, i.e., under extended duration of exposure to  
 413 nutrient limitation. The increase in velocity correlation with age, especially a significant increment during the  
 414 late stationary stage, signals an altered swimming behavior toward ballistic regime ( $t = 430$  h). Similar to S-1,  
 a significant reduction of the photosynthetic performance accompanies the altered motility (inset), measured as  $F_v/F_m$ , and the maximum electron



415 transfer rate,  $ETR_{max}$ . t-test between 336 h and 672 h for both  $F_v/F_m$ , and  $ETR_{max}$   $p < 0.001$ ; asterisks indicate  
416 statistically significant difference.

417 Reconfigurable LDs actively govern the vertical migration of nutrient-limited motile phytoplankton.  
418 Alongside LD growth and cytoplasmic translocation, the cells—in a strain-specific manner—undergo  
419 morphological changes, whereby S-1 cells become smaller, while S-2 cells become flatter (platelets) losing  
420 the rotational symmetry about the cell's long axis (Figures 4A-D). We develop a computational model for  
421 cell mechanics to delineate how LD size and intracellular location, in conjunction with morphological traits,  
422 shape the swimming properties of motile phytoplankton. For S-1, accumulation of LDs below the cell  
423 nucleus, mediated by directed translocation (Figure 1), shifts the center of gravity above the geometric  
424 center, thus rendering the cell slightly *top-heavy* (48) relative to the LD-free condition under nutrient replete  
425 conditions. Top-heavy cells take longer to orient back to their stable swimming direction when perturbed  
426 therefrom, resulting in longer reorientation timescales,  $\tau_r$  (Figure 3E, Methods) and lower angular  
427 reorientation speeds (Figures 3E-G). Equivalently, the active torque (and hence the rotational kinetic energy)  
428 required to keep the cells oriented along their initial swimming direction increases as the LDs grow in size  
429 ( $V_L$ , Figure 3H), and the distance from the geometric center increases ( $L_L$ , Figure 3I). Taken together, as the  
430 LDs grow and accumulate below the nucleus, cells progressively gain orientational stability in  
431 opposite direction, thereby shifting the swimming trait from negative to positive gravitaxis.

432 When a stable upward swimming cell under nutrient replete conditions (Figures 1 and 3) is perturbed to a  
433 horizontal configuration ( $\theta = 90^\circ$  with the cell long axis perpendicular to the gravity vector, Figures 4E-G), it  
434 tries to regain the stable swimming direction by reorienting back. The stable swimming direction (upward  
435 and downward are denoted by +ve and -ve angular speeds respectively), and the rapidity of reorientation  
436 captured by the magnitude of the angular velocity, are underpinned by the intracellular organelle distribution  
437 and propulsion forces. Cells in the exponential growth stage reorient upward (negative gravitaxis) with  
438 positive angular velocity, owing to the size and location of the LDs lying within the shaded portion (grey hue  
439 based on experimental data, Figure 4E). This confirms the high ballisticity and low reorientation times  
440 observed during the exponential growth stage (Figures 3D, E). During the late exponential stage ( $t = 300$  h,  
441 Figure 4F), cells become neutrally stable, with similar probability of turning stable or unstable in the  
442 direction of gravity vector. Owing to the low LD volume, and localization in the region of vanishing angular  
443 speed (grey hue close to the dashed line, Figure 4F), ballisticity of swimming reduces, with increase in the  
444 reorientation time (*i.e.*, the angular speed changes to -ve sign with increased magnitude, as shown by the  
445 color bar). This is validated by the reduced swimming speed and ballisticity as the population transitions to  
446 stationary stage (Figures 3C, D). Finally, cells from the late stationary stage ( $t = 700$  h, Figure 1E), are  
447 strongly stable in the downward direction (positively gravitactic), due to the large LD size and conspicuous  
448 localization below the nucleus, eliciting a strong reorientation speed  $\sim -0.01$  s<sup>-1</sup> (Figure 4G). Since the  
449 shaded portion falls in the region of the unstable angular speed (to the right of the dashed line), cells of S-1  
450 would require sufficient active torque in the other direction so as to become stable upward swimmers  
451 (Figures 3H, I).

452 Our mechanistic model, in contradiction to our experimental observations (Figures 3G, H), predicts that the  
453 cells from S-2 being top-heavy under nutrient replete conditions (48), would turn highly stable down  
454 swimmers (positively gravitactic) as LDs progressively appear. We reconcile this apparent discrepancy by  
455 accounting for the concomitant morphological changes in S-2 under nutrient limitation. While S-1 preserves  
456 the rotational symmetry under nutrient depletion, thus maintaining the ratio between the lengths of the semi-  
457 minor ( $b$ ) and semi-major ( $a$ ) axes,  $b/a \sim 0.65$  at 60 h and  $\sim 0.6$  at 696 h (Figures 4A, B), cells of the S-2 turn  
458 into platelet morphology, thus losing their axial symmetry in face of nutrient depletion (Figure 4C, D). The  
459 platelet morphology is quantified by the degree of flatness,  $(c/a)^{-1}$ , where  $2c$  is the maximum dimension  
460 orthogonal to both  $a$  and  $b$  (lower the value of  $c/a$ , flatter is the cell). The value of  $c/a$  reduces from  $\sim 0.7$  to  
461  $\sim 0.31$ , while  $b/a$  varies from  $\sim 0.7$  at 96 h (48) to  $\sim 0.6$  at 860 h, resulting in lower active reorientational



462 torque to maintain negative gravitaxis during the late stationary stage relative to its early exponential  
 463 counterpart. By mapping  $c/a$  against growing lipid volume (Figure 3H) and the cytoplasmic position (Figure  
 464 3I), we compute the active torque required to maintain negative gravitaxis (phase plot in Figure 4H–I). The  
 465 active torque required for S-2 cells to assume a stable configuration attenuates as nutrient depletion persists,  
 466 emerging due to an interplay between the cell flatness and the combined effect of LD size and their  
 467 localization within the cytoplasm. The reduction in the active torque follows directly from the corresponding  
 468 drop in the rotational viscous resistance ( $\sim 30\%$ ) experienced by platelet-shaped cells under prolonged  
 469 nutrient limitation. In summary, LDs, in synergy with strain-specific morphological traits, enable cells to  
 470 differentially fine tune migratory properties in face of nutrient limitation. Herein, the rotational symmetry in  
 471 cell shape about the cell's long axis plays a key role in regulating the vertical migration. This morphological  
 472 pliability allows S-2 to harness the spatio-temporal dynamics of cytoplasmic LDs to enhance vertical  
 473 motility, in contrast to S-1. This differential, strain-specific LD-governed migratory trait conforms to the  
 474 measured physiological changes (ROS, photosynthesis and trophic strategy) under nutrient limitation and  
 475 upon reincorporation of nutrients (Figure 4I inset).

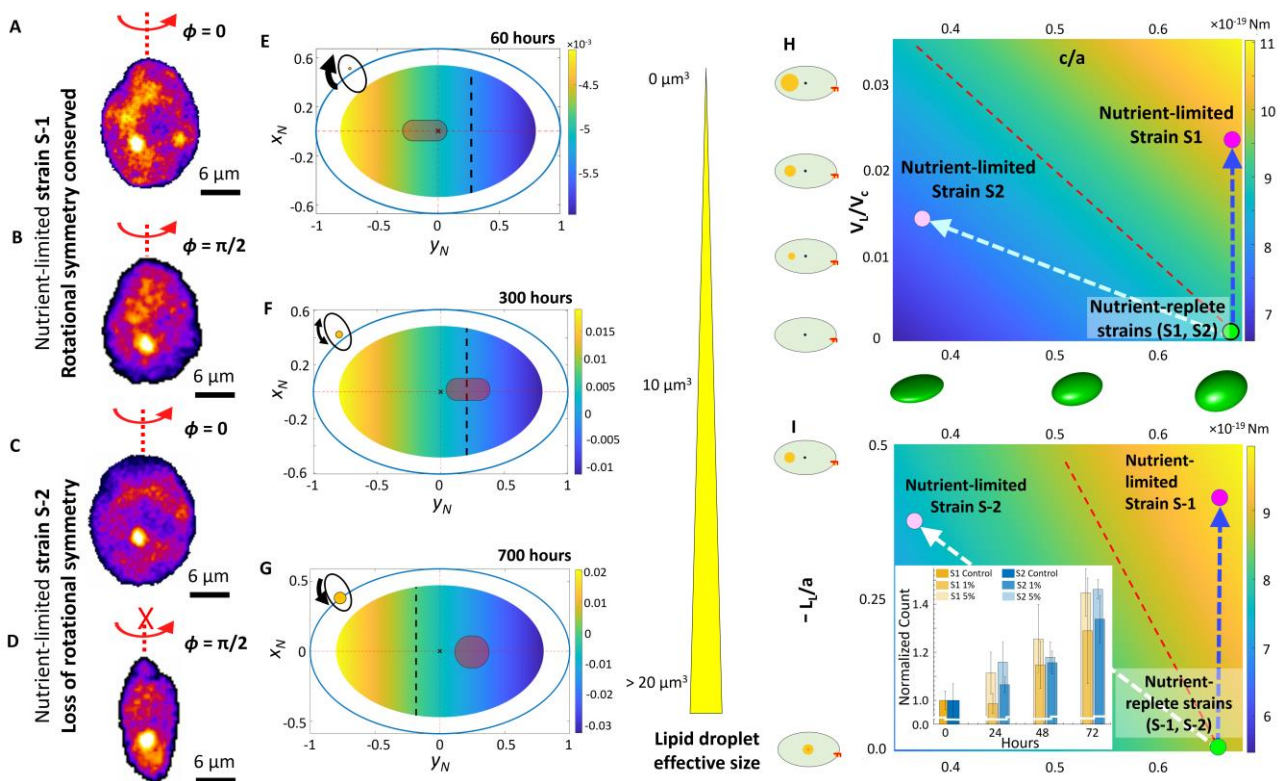

476

477

478 **Figure 4. A synergistic interplay of active LD translocation and morphological pliability governs**  
 479 **strain-specific adaptive migration under nutrient limitation.** (A–D) The variation in cell shape in nutrient-  
 480 replete and nutrient-depleted conditions for S-1 (panel A and B) and S-2 (panels C and D). Cells of S-1 population  
 481 retain axisymmetric morphology during the course of nutrient depletion, while for the S-2 cells, the ratio of  $c$  and  $b$   
 482 reduces from  $\sim 1$  to  $0.53 \pm 0.13$ . (E–G) Phase plots delineating the orientational stability of a swimming cell as the  
 483 position of cytoplasmic LDs change (based on experimental data presented in Figures 1C–E), mapped against the  
 484 corresponding reorientation speed from an unstable to a stable orientation (Methods). The phase plots are obtained  
 485 from experimental data, accounting for the morphology, nucleus size and position relative to the geometric center,  
 486 effective lipid size and position, and swimming velocity corresponding to the respective growth stages. The colorbar  
 487 represent the magnitude of the angular speed about its geometric center. The phase diagram is obtained by varying  
 488 all possible locations over which LDs may reside (changing  $\phi_L$  and  $L_L$ ). For the angular speed estimation, the  
 489 cytoplasm density was taken to be  $1050 \text{ kgm}^{-3}$  (16), nucleus density as  $1300 \text{ kgm}^{-3}$  (17) and lipid density as  
 490  $\sim 900 \text{ kgm}^{-3}$  (18). The shaded portion in the above plots delineates the possible positions a lipid droplet may  
 491 actually be observed (plotted using the mean and the variance from experimental observations, Figures 1C–E). (H–I) Phase plot of active torque required by a

492 cell to reorient itself as an upward swimmer (negative gravitaxis) for the combination of the ratio of  $a$  and  $c$  and (H)  
493 ratio of the lipid and the cell volume, and (I) ratio of the lipid position from the cell geometric center and  $a$ . The green  
494 circle shows nutrient-replete cells while magenta circles show nutrient-depleted cells (magenta indicates S-1, light  
495 magenta S-2). The dashed red line shows the iso-active torque line. Active torque required by a cell increases with  
496 nutrient depletion (when lipid droplets increase in size and translocate opposite to the position of the flagellum).  
497 However, the change in the active torque varies across strains and gives a strain-specific behavioral shift. Inset panel (I)  
498 shows the daily variation in the normalized cell count of nutrient depleted cells upon 1%  $C_0$  and 5%  $C_0$  inoculation of  
499 f/2-Si medium (added every 24 hours, Methods). S-1 which is known to have a higher growth rate ( $> 0.65/\text{day}$ ), in  
500 agreement with (57) compared to S-2 (0.4/day, (48)) shows a diminished recovery rate at very low availability of  
501 nutrient concentration.  
502

## 503 Discussion

504 Under nutrient limitation, motile phytoplankton species resort to two distinct strategies, which taken  
505 together, indicate their ability to maximize resource acquisition and fitness. Strain S-1 (CCMP3107) reduces  
506 vertical motility, and switches to phagotrophy, while strain S-2 (CCMP452) enhances vertical migration,  
507 switching to stronger gravitactic behavior aided by the morphological pliability. At the level of single cells,  
508 the strain-specific contrasting strategies emerge due to the active biomechanical control exerted by the  
509 spatio-temporal dynamics of cytoplasmic LDs on the swimming properties. By spanning different stages of  
510 growth in the cells cultures as a proxy of ecologically relevant nutrient concentrations, we quantify the  
511 behavioral and physiological traits and underscore their interrelations as coupled traits which enable species  
512 to enhance fitness under nutrient limitations. Cells of S-1 require increasing levels of active torque (hence  
513 energetically expensive, particularly in face of nutrient limitation) to sustain negative gravitaxis, reflected by  
514 the depletion-induced increase in the reorientation time. For the S-2, the active torque required to maintain  
515 vertical motility is reduced (so is the reorientation time), due to the reduction of the viscous drag. Leveraging  
516 the experimental and computational data, we present a dissipative power budget, accounting for the gain in  
517 the gravitational energy and viscous losses incurred by the swimming cells per unit time. The power  
518 dissipated reduces for both strains, thereby reducing the active energy input by the cells to sustain motility,  
519 however they do so distinctly. S-1 suppresses motility and reduces cell size to avoid the viscous dissipation  
520 under nutrient limitation, whereas S-2 is able to sustain, and even enhance vertical motility, benefitting from  
521 a lower rotational and translational viscous drags, and hence energy dissipation under prolonged limited  
522 settings. For S-1, the energy dissipation drops from 3.75 fW to 1.18 fW as the population transitions from  
523 exponential to stationary growth stage; while for S-2, the dissipation decreases from 6.31 fW to 3.24 fW, as  
524 the cell transforms into platelet morphology during the late stationary stage. These biomechanical changes  
525 and energetic insights are backed up by the alteration of physiological traits, specifically shift in the trophic  
526 mode (photo- to phagotrophy in S-1, Figure 3F) and accompanying strain-specific photophysiological  
527 changes (Figures 3D and H), ultimately enabling the strains to maximize fitness by repositioning across  
528 distinct vertical depths in natural environments.

529 The dynamic tuning of active torque and dissipative power under nutrient limitation suggests that motile  
530 phytoplankton may have exquisite decision making abilities, complementing intrinsic mechanisms (58).  
531 While S-1 cells reduce dissipative power progressively as nutrition depletion persists, S-2 first increases  
532 dissipative losses by enhancing active torques (from early exponential to early stationary growth stage),  
533 thereafter reducing the active torque and dissipation aided favorably by the morphological changes over  
534 longer periods of nutrient depletion. The ability to arrive at a physiologically-amenable behavioral trait  
535 allows motile phytoplankton to conserve energy dynamically as nutrient landscapes vary. Maintaining  
536 vertical motility even under nutrient limitations allows S-2 cells to enhance fitness through chanced  
537 encounters with ephemeral molecules as and when they are available (9, 35). We confirm this by comparing  
538 the relative growth rates of nutrient-starved populations of S-1 and S-2 upon reincorporation of small  
539 amounts of fresh nutrients (1% and 5%  $C_0$ , Methods). S-1 grew slower relative to S-2, although under  
540 nutrient-replete conditions S-1 shows higher growth rates, suggesting that the strain S-2 has a higher nutrient

541 affinity, *i.e.*, better ability to utilize miniscule amounts of nutrients as and when they are available (inset,  
 542 Figure 4I) for the first 48 hours, after which S-1 cells match up the growth rate of S-2. This is further backed  
 543 by our measurements showing rapid lipolysis of S-2 cells compared to S-1 (Figure 2) upon nutrient  
 544 reincorporation. Our data suggest that motile phytoplankton may harness contrasting inter-strain behavioral  
 545 traits to maintain population viability via distribution of labor and energy resources under nutrient limited  
 546 conditions (59, 60).  
 547  
 548

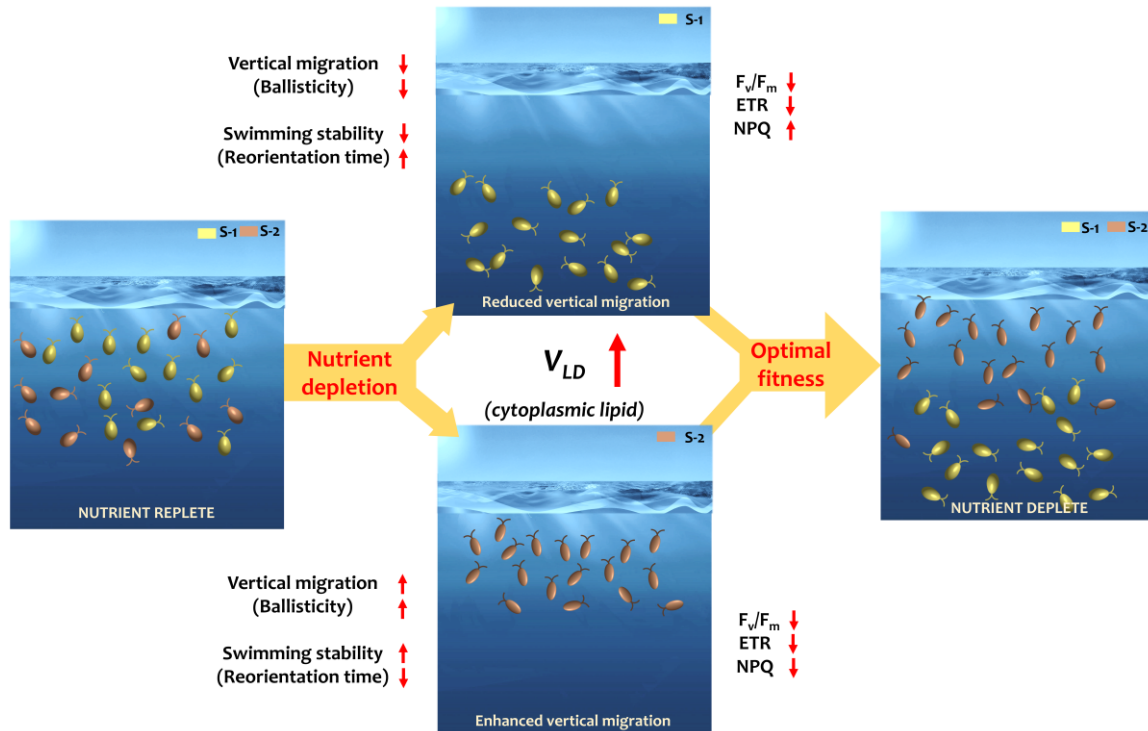

549

550 **Figure 5. LD-based energy storage and strain-specific migratory shifts act concertedly as coupled**  
 551 **traits to enhance fitness of nutrient-limited phytoplankton populations.** Naturally co-existing strains of  
 552 motile phototrophic *H. akashiwo*, S-1 and S-2, execute diel vertical migration under nutrient replete conditions. The  
 553 phytoplankton population carry out photosynthesis, shuttling between light-rich photic zone during the day time and  
 554 nutrient-rich depths at night. While S-1 exhibits stronger motility (high ballisticity and low reorientation time), and  
 555 higher photosynthetic efficiency (higher  $F_v/F_m$  and  $ETR_{max}$  values) relative to S-2, it is less adapted under high light  
 556 conditions indicated by the lower non-photochemical quenching (NPQ) parameter. As nutrient limitation sets off, both  
 557 strains generate cytoplasmic LDs, while distinct behavioral and physiological shifts co-emerge, indicating that the LD-  
 558 based energy storage and emergent migratory behavior adapt differentially. In nutrient limited settings, generation of  
 559 intracellular LDs and their directional translocation drive suppression of vertical migration in S-1, while for S-2,  
 560 significant enhancement in measured. Enhancement of the vertical motility in S-2 is facilitated by the concomitant  
 561 morphological change, specifically due to the loss of the rotational symmetry as cells turn flatter in shape (platelets),  
 562 thereby reducing the viscous losses during swimming. The morphological shift allows S-2 cells to conserve energy  
 563 while maintaining motility in the upper light-rich surface waters, while for S-1 cells, the loss of ballisticity and  
 564 orientational stability drive them toward diffusive regime in deeper waters. Alongside, the increased NPQ and reduced  
 565  $F_v/F_m$  values of S-1 conform with our observation their trophic switch from photo- to phagotrophic mode of resource  
 566 acquisition. S-2, on the other hand, increases their ballisticity and motility, thus increasing the residence time in shallow  
 567 light-rich waters. A relatively lower NPQ shows their enhanced ability to use the incident light toward photochemical  
 568 processes. Finally, the reduction of the cell size in S-1, and an increase in the overall cell size of S-2 indicate that the  
 569 two strains diversify their strategies for resource acquisition under limited settings. Under limited concentration of  
 570 nutrients, small, low motile cells with high surface area to cell volume ratios will have competitive advantage (a strategy  
 571 potentially adopted by S-1). In contrast, for stable cell nutrient quota, increased size is advantageous (2), which may  
 572 allow S-2 to acquire just enough nutrients, e.g., upon chanced molecular encounters, for growth and division thus  
 573 enhancing fitness during nutrient limited conditions (inset, Figure 4I). These differential strain-specific responses  
 574 suggest that motile phytoplankton possess concerted decision-making mechanisms that allow contrasting adaptive  
 575 strategies for acquiring a limited pool of nutrients, while maximization population-scale fitness. In doing so,



576 phytoplankton redistribute along the vertical column, thus cumulatively covering larger physical space, while  
577 minimizing the overlap and potential inter-strain competition for limited resources.

578

579 Understanding how phytoplankton adapt and survive the rapidly evolving nutrient landscapes of today's  
580 oceans remains a crucial challenge. Accurate prediction of the cascading biogeochemical implications will  
581 rely on mechanistic understanding of co-emerging behavioural and physiological responses, and the  
582 interrelations therein (2, 61). Our data suggest that migration and nutrient storage—so far considered  
583 independent traits (35)—co-evolve in a concerted fashion to maximize population fitness, via seemingly  
584 contrasting strategies to accommodate strain-specific constraints. The role of lipid droplets in regulating the  
585 biomechanics of phytoplankton migration may be conserved evolutionarily among eukaryotic swimmers,  
586 thus future efforts could be directed toward understanding the molecular underpinnings of the migration-  
587 storage interrelations. In addition to providing new mechanistic insights into the paradoxical diversification of  
588 species (62, 63), our findings offer a fresh perspective to the co-emerging adaptive traits in phytoplankton  
589 under stressful environments, thereby opening up quantitative avenues to assess impacts of multiple stressors  
590 (1), beyond and in conjunction with evolving nutrient landscapes, which plague marine environments today.

591

## 592 References

- 593 1. D. B. Van de Waal, E. Litchman, Multiple global change stressor effects on phytoplankton nutrient acquisition  
594 in a future ocean. *Philos. Trans. R. Soc. B Biol. Sci.* **375**, 20190706 (2020).
- 595 2. C. M. Moore, M. M. Mills, K. R. Arrigo, I. Berman-Frank, L. Bopp, P. W. Boyd, E. D. Galbraith, R. J. Geider,  
596 C. Guieu, S. L. Jaccard, T. D. Jickells, J. La Roche, T. M. Lenton, N. M. Mahowald, E. Marañoń, I. Marinov, J.  
597 K. Moore, T. Nakatsuka, A. Oschlies, M. A. Saito, T. F. Thingstad, A. Tsuda, O. Ulloa, Processes and patterns  
598 of oceanic nutrient limitation. *Nat. Geosci.* **6**, 701–710 (2013).
- 599 3. L. A. Bristow, W. Mohr, S. Ahmerkamp, M. M. M. Kuypers, Nutrients that limit growth in the ocean. *Curr.*  
600 *Biol.* **27**, R474–R478 (2017).
- 601 4. M. J. Behrenfeld, R. T. O'Malley, D. A. Siegel, C. R. McClain, J. L. Sarmiento, G. C. Feldman, A. J. Milligan,  
602 P. G. Falkowski, R. M. Letelier, E. S. Boss, Climate-driven trends in contemporary ocean productivity. *Nature.*  
603 **444**, 752–755 (2006).
- 604 5. J. K. Moore, W. Fu, F. Primeau, G. L. Britten, K. Lindsay, M. Long, S. C. Doney, N. Mahowald, F. Hoffman, J.  
605 T. Randerson, Sustained climate warming drives declining marine biological productivity. *Science (80-. ).* **359**,  
606 1139–1143 (2018).
- 607 6. J. J. Polovina, E. A. Howell, M. Abecassis, Ocean's least productive waters are expanding. *Geophys. Res. Lett.*  
608 **35**, L03618 (2008).
- 609 7. S. L. Hinder, G. C. Hays, M. Edwards, E. C. Roberts, A. W. Walne, M. B. Gravenor, Changes in marine  
610 dinoflagellate and diatom abundance under climate change. *Nat. Clim. Chang.* **2**, 271–275 (2012).
- 611 8. G. M. Hallegraeff, Ocean Climate Change, Phytoplankton Community Responses, and Harmful Algal Blooms:  
612 A Formidable Predictive Challenge. *J. Phycol.* **46**, 220–235 (2010).
- 613 9. J. P. Mellard, K. Yoshiyama, E. Litchman, C. A. Klausmeier, The vertical distribution of phytoplankton in  
614 stratified water columns. *J. Theor. Biol.* **269**, 16–30 (2011).
- 615 10. K. Yoshiyama, J. P. Mellard, E. Litchman, C. A. Klausmeier, Phytoplankton Competition for Nutrients and  
616 Light in a Stratified Water Column. *Am. Nat.* **174**, 190–203 (2009).
- 617 11. C. A. Klausmeier, E. Litchman, Algal games: The vertical distribution of phytoplankton in poorly mixed water  
618 columns. *Limnol. Oceanogr.* **46**, 1998–2007 (2001).
- 619 12. G. Li, L. Cheng, J. Zhu, K. E. Trenberth, M. E. Mann, J. P. Abraham, Increasing ocean stratification over the  
620 past half-century. *Nat. Clim. Chang.* **10**, 1116–1123 (2020).
- 621 13. T. Zohary, B. Herut, M. D. Krom, R. Fauzi C. Mantoura, P. Pitta, S. Psarra, F. Rassoulzadegan, N. Stambler, T.  
622 Tanaka, T. Frede Thingstad, E. Malcolm S. Woodward, P-limited bacteria but N and P co-limited  
623 phytoplankton in the Eastern Mediterranean—a microcosm experiment. *Deep Sea Res. Part II Top. Stud.*  
624 *Oceanogr.* **52**, 3011–3023 (2005).
- 625 14. M. A. Saito, T. J. Goepfert, J. T. Ritt, Some thoughts on the concept of colimitation: Three definitions and the  
626 importance of bioavailability. *Limnol. Oceanogr.* **53**, 276–290 (2008).
- 627 15. M. Winder, U. Sommer, Phytoplankton response to a changing climate. *Hydrobiologia.* **698**, 5–16 (2012).
- 628 16. M. Wada, A. Miyazaki, T. Fujii, On the Mechanisms of Diurnal Vertical Migration Behavior of *Heterosigma*  
629 *akashiwo* (Raphidophyceae). *Plant Cell Physiol.* **26**, 431–436 (1985).
- 630 17. R. Milo, R. Phillips, *Cell Biology by the Numbers* (Garland Science, 2015;  
631 <https://www.taylorfrancis.com/books/9781317230694>).
- 632 18. M. Imran, M. Nadeem, Triacylglycerol composition, physico-chemical characteristics and oxidative stability of



- 633 interesterified canola oil and fully hydrogenated cottonseed oil blends. *Lipids Health Dis.* **14**, 138 (2015).
- 634 19. E. Litchman, C. A. Klausmeier, K. Yoshiyama, Contrasting size evolution in marine and freshwater diatoms.
- 635 *Proc. Natl. Acad. Sci.* **106**, 2665–2670 (2009).
- 636 20. A. Beckmann, I. Hense, Torn between extremes: the ups and downs of phytoplankton. *Ocean Dyn.* **54**, 581–592
- 637 (2004).
- 638 21. O. Ross, J. Sharples, Phytoplankton motility and the competition for nutrients in the thermocline. *Mar. Ecol.*
- 639 *Prog. Ser.* **347**, 21–38 (2007).
- 640 22. E. Litchman, C. A. Klausmeier, Trait-Based Community Ecology of Phytoplankton. *Annu. Rev. Ecol. Evol.*
- 641 *Syst.* **39**, 615–639 (2008).
- 642 23. Z. V. Finkel, J. Beardall, K. J. Flynn, A. Quigg, T. A. V. Rees, J. A. Raven, Phytoplankton in a changing world:
- 643 cell size and elemental stoichiometry. *J. Plankton Res.* **32**, 119–137 (2010).
- 644 24. C. Lindemann, Ø. Fiksen, K. H. Andersen, D. L. Aksnes, Scaling Laws in Phytoplankton Nutrient Uptake
- 645 Affinity. *Front. Mar. Sci.* **3** (2016), doi:10.3389/fmars.2016.00026.
- 646 25. E. D. Galbraith, A. C. Martiny, A simple nutrient-dependence mechanism for predicting the stoichiometry of
- 647 marine ecosystems. *Proc. Natl. Acad. Sci.* **112**, 8199–8204 (2015).
- 648 26. S. Zhu, W. Huang, J. Xu, Z. Wang, J. Xu, Z. Yuan, Metabolic changes of starch and lipid triggered by nitrogen
- 649 starvation in the microalga *Chlorella zofingiensis*. *Bioresour. Technol.* **152**, 292–298 (2014).
- 650 27. L. Recht, A. Zarka, S. Boussiba, Patterns of carbohydrate and fatty acid changes under nitrogen starvation in the
- 651 microalgae *Haematococcus pluvialis* and *Nannochloropsis* sp. *Appl. Microbiol. Biotechnol.* **94**, 1495–1503
- 652 (2012).
- 653 28. J. Msanne, D. Xu, A. R. Konda, J. A. Casas-Mollano, T. Awada, E. B. Cahoon, H. Cerutti, Metabolic and gene
- 654 expression changes triggered by nitrogen deprivation in the photoautotrophically grown microalgae
- 655 *Chlamydomonas reinhardtii* and *Coccomyxa* sp. C-169. *Phytochemistry.* **75**, 50–59 (2012).
- 656 29. T. F. Thingstad, L. Øvreås, J. K. Egge, T. Løvdal, M. Heldal, Use of non-limiting substrates to increase size; a
- 657 generic strategy to simultaneously optimize uptake and minimize predation in pelagic osmotrophs? *Ecol. Lett.*
- 658 **8**, 675–682 (2005).
- 659 30. B. A. S. Van Mooy, H. F. Fredricks, B. E. Pedler, S. T. Dyrman, D. M. Karl, M. Koblížek, M. W. Lomas, T. J.
- 660 Mincer, L. R. Moore, T. Moutin, M. S. Rappé, E. A. Webb, Phytoplankton in the ocean use non-phosphorus
- 661 lipids in response to phosphorus scarcity. *Nature.* **458**, 69–72 (2009).
- 662 31. J. J. Grzymalski, A. M. Dussaq, The significance of nitrogen cost minimization in proteomes of marine
- 663 microorganisms. *ISME J.* **6**, 71–80 (2012).
- 664 32. R. Margalef, Life-forms of phytoplankton as survival alternatives in an unstable environment. *Oceanol. Acta.* **1**,
- 665 493–509 (1978).
- 666 33. R. Schuech, S. Menden-Deuer, Going ballistic in the plankton: Anisotropic swimming behavior of marine
- 667 protists. *Limnol. Oceanogr. Fluids Environ.* **4**, 1–16 (2014).
- 668 34. J. P. Grover, Is Storage an Adaptation to Spatial Variation in Resource Availability? *Am. Nat.* **173**, E44–E61
- 669 (2009).
- 670 35. J. P. Grover, Sink or swim? Vertical movement and nutrient storage in phytoplankton. *J. Theor. Biol.* **432**, 38–
- 671 48 (2017).
- 672 36. S. Malitsky, C. Ziv, S. Rosenwasser, S. Zheng, D. Schatz, Z. Porat, S. Ben-Dor, A. Aharoni, A. Vardi, Viral
- 673 infection of the marine alga *Emiliania huxleyi* triggers lipidome remodeling and induces the production of
- 674 highly saturated triacylglycerol. *New Phytol.* **210**, 88–96 (2016).
- 675 37. J. A. Olzmann, P. Carvalho, Dynamics and functions of lipid droplets. *Nat. Rev. Mol. Cell Biol.* **20**, 137–155
- 676 (2019).
- 677 38. N. Guéguen, D. Le Moigne, A. Amato, J. Salvaing, E. Maréchal, Lipid Droplets in Unicellular Photosynthetic
- 678 Stramenopiles. *Front. Plant Sci.* **12** (2021), doi:10.3389/fpls.2021.639276.
- 679 39. J. P. Grover, Resource Competition in a Variable Environment: Phytoplankton Growing According to the
- 680 Variable-Internal-Stores Model. *Am. Nat.* **138**, 811–835 (1991).
- 681 40. K. F. Edwards, M. K. Thomas, C. A. Klausmeier, E. Litchman, Allometric scaling and taxonomic variation in
- 682 nutrient utilization traits and maximum growth rate of phytoplankton. *Limnol. Oceanogr.* **57**, 554–566 (2012).
- 683 41. N. Ji, L. Lin, L. Li, L. Yu, Y. Zhang, H. Luo, M. Li, X. Shi, D.-Z. Wang, S. Lin, Metatranscriptome analysis
- 684 reveals environmental and diel regulation of a *Heterosigma akashiwo* (raphidophyceae) bloom. *Environ.*
- 685 *Microbiol.* **20**, 1078–1094 (2018).
- 686 42. N. Ji, Z. Zhang, J. Huang, L. Zhou, S. Deng, X. Shen, S. Lin, Utilization of various forms of nitrogen and
- 687 expression regulation of transporters in the harmful alga *Heterosigma akashiwo* (Raphidophyceae). *Harmful*
- 688 *Algae.* **92**, 101770 (2020).
- 689 43. T. Smayda, Ecophysiology and bloom dynamics of *Heterosigma akashiwo* (Raphidophyceae). *Physiol. Ecol.*
- 690 *Harmful Algal Bloom.* (1998) (available at <http://ci.nii.ac.jp/naid/10018145802/en/>).
- 691 44. T. J. Hansen, M. Hondzo, M. T. Mashek, D. G. Mashek, P. A. Lefebvre, Algal swimming velocities signal fatty
- 692 acid accumulation. *Biotechnol. Bioeng.* **110**, 143–152 (2013).
- 693 45. J. You, K. Mallery, D. G. Mashek, M. Sanders, J. Hong, M. Hondzo, Microalgal swimming signatures and

- 694 neutral lipids production across growth phases. *Biotechnol. Bioeng.* **117**, 970–980 (2020).
- 695 46. D. W. Pond, The physical properties of lipids and their role in controlling the distribution of zooplankton in the  
696 oceans. *J. Plankton Res.* (2012), doi:10.1093/plankt/fbs027.
- 697 47. Y. Yamasaki, T. Shikata, A. Nukata, S. Ichiki, S. Nagasoe, T. Matsubara, Y. Shimasaki, M. Nakao, K.  
698 Yamaguchi, Y. Oshima, T. Oda, M. Ito, I. R. Jenkinson, M. Asakawa, T. Honjo, Extracellular polysaccharide-  
699 protein complexes of a harmful alga mediate the allelopathic control it exerts within the phytoplankton  
700 community. *ISME J.* **3**, 808–817 (2009).
- 701 48. A. Sengupta, F. Carrara, R. Stocker, Phytoplankton can actively diversify their migration strategy in response to  
702 turbulent cues. *Nature.* **543**, 555–558 (2017).
- 703 49. F. Carrara, A. Sengupta, L. Behrendt, A. Vardi, R. Stocker, Bistability in oxidative stress response determines  
704 the migration behavior of phytoplankton in turbulence. *Proc. Natl. Acad. Sci.* **118**, e2005944118 (2021).
- 705 50. C. McLean, S. T. Haley, G. J. Swarr, M. C. K. Soule, S. T. Dyrhman, E. B. Kujawinski, Harmful Algal Bloom-  
706 Forming Organism Responds to Nutrient Stress Distinctly From Model Phytoplankton. *bioRxiv.* **1–37** (2021),  
707 doi:10.1101/2021.02.08.430350.
- 708 51. S. Hatano, Y. Hara, M. Takahashi, Photoperiod and nutrients on the vertical migratory behavior of a red tide  
709 flagellate, *Heterosigma akashiwo*. *J. Japanese Phycol.* **31**, 263–269 (1983).
- 710 52. M. Wada, Y. Hara, M. Kato, M. Yamada, T. Fujii, Diurnal appearance, fine structure, and chemical  
711 composition of fatty particles in *Heterosigma akashiwo* (Raphidophyceae). *Protoplasma.* **137**, 134–139 (1987).
- 712 53. N. R. Baker, Chlorophyll Fluorescence: A Probe of Photosynthesis In Vivo. *Annu. Rev. Plant Biol.* **59**, 89–113  
713 (2008).
- 714 54. E. D. Tobin, D. Grünbaum, J. Patterson, R. A. Cattolico, Behavioral and Physiological Changes during Benthic-  
715 Pelagic Transition in the Harmful Alga, *Heterosigma akashiwo*: Potential for Rapid Bloom Formation. *PLoS*  
716 *One.* **8**, e76663 (2013).
- 717 55. H. J. Jeong, K. A. Seong, N. S. Kang, Y. Du Yoo, S. W. Nam, J. Y. Park, W. Shin, P. M. Glibert, D. Johns,  
718 Feeding by raphidophytes on the cyanobacterium *Synechococcus* sp. *Aquat. Microb. Ecol.* **58**, 181–195 (2010).
- 719 56. H. J. Jeong, Mixotrophy in Red Tide Algae Raphidophytes I. *J. Eukaryot. Microbiol.* **58**, 215–222 (2011).
- 720 57. S. L. Strom, E. L. Harvey, K. A. Fredrickson, S. Menden-Deuer, Broad Salinity Tolerance as a Refuge from  
721 Predation in the Harmful Raphidophyte Alga *Heterosigma akashiwo* (Raphidophyceae). *J. Phycol.* **49**, 20–31  
722 (2013).
- 723 58. A. K. Yamazaki, D. Kamykowski, A dinoflagellate adaptive behavior model: response to internal biochemical  
724 cues. *Ecol. Modell.* **134**, 59–72 (2000).
- 725 59. S. A. West, G. A. Cooper, Division of labour in microorganisms: an evolutionary perspective. *Nat. Rev.*  
726 *Microbiol.* **14**, 716–723 (2016).
- 727 60. S. Menden-Deuer, J. Rowlett, M. Nursultanov, S. Collins, T. Ryneanson, Biodiversity of marine microbes is  
728 safeguarded by phenotypic heterogeneity in ecological traits. *PLoS One.* **16**, e0254799 (2021).
- 729 61. K. J. Flynn, Ecological modelling in a sea of variable stoichiometry: Dysfunctionality and the legacy of  
730 Redfield and Monod. *Prog. Oceanogr.* **84**, 52–65 (2010).
- 731 62. G. E. Hutchinson, The Paradox of the Plankton. *Am. Nat.* (1961), doi:10.1086/282171.
- 732 63. L. Li, P. Chesson, The Effects of Dynamical Rates on Species Coexistence in a Variable Environment: The  
733 Paradox of the Plankton Revisited. *Am. Nat.* **188**, E46–E58 (2016).
- 734 64. N. Tarantino, J.-Y. Tinevez, E. F. Crowell, B. Boisson, R. Henriques, M. Mhlanga, F. Agou, A. Israël, E.  
735 Laplantine, TNF and IL-1 exhibit distinct ubiquitin requirements for inducing NEMO–IKK supramolecular  
736 structures. *J. Cell Biol.* **204**, 231–245 (2014).
- 737 65. A. M. Roberts, F. M. Deacon, Gravitaxis in motile micro-organisms: the role of fore–aft body asymmetry. *J.*  
738 *Fluid Mech.* **452**, 405–423 (2002).
- 739 66. S. H. Koenig, Brownian motion of an ellipsoid. A correction to Perrin’s results. *Biopolymers.* **14**, 2421–2423  
740 (1975).
- 741 67. J. Happel, H. Brenner, *Low Reynolds number hydrodynamics* (Springer Netherlands, Dordrecht, 1981;  
742 <http://link.springer.com/10.1007/978-94-009-8352-6>), vol. 1 of *Mechanics of fluids and transport processes*.
- 743 68. F. Perrin, Mouvement brownien d’un ellipsoïde - I. Dispersion diélectrique pour des molécules ellipsoïdales. *J.*  
744 *Phys. Radium.* **5**, 497–511 (1934).
- 745

## 746 **Materials and Methods**

747 **Cell culture.** We focus on two different strains of raphidophyte *Heterosigma akashiwo*, namely, CCMP3107  
748 (S-1) and CCMP452 (S-2) for our investigations. For the experiments, cells were cultured in 50 mL sterile  
749 glass tubes under a diel light cycle (14 h light: 10 h dark) in f/2 (minus silica, -Si) medium ( $C_0$ ), at 22°C. For  
750 propagation of the cell cultures, 2 mL of the parent culture was inoculated into 25 mL of fresh medium every  
751 two weeks. For propagation of cultures in nutrient-limited environments, f/2 (-Si) medium was appropriately  
752 diluted in Artificial Sea Water (ASW, 38 g/L of sea salts in MilliQ water) to reach 10%  $C_0$  (10x dilution, 10  
753 mL f/2(-Si) and 90 mL ASW) and 1%  $C_0$  (100x dilution, 10 mL 10x f/2(-Si) and 90 mL ASW) dilutions. *H.*  
754 *akashiwo* 3107, 452 cultures used for phenotypic traits quantification experiments were propagated from a 5-  
755 7 days old pre-culture (mid-exponential growth stage) to standardize the starting population physiological  
756 status. A fixed period of the day (between 9:00 h and 15:00 h) was chosen for the experiments to rule out any  
757 possible artifact due to the diurnal migration pattern of phytoplankton species, including *H. akashiwo*.

758 **Quantification of lipid droplet volume and intracellular effective size localization.** To characterize and  
759 quantify the biosynthesis and accumulation of lipid droplet (LD), cells were sampled from the culture tube at  
760 different time intervals to cover whole exponential and stationary growth stages and stained with neutral  
761 lipids fluorescent stain Nile Red (ThermoFisher, excitation/emission 552/636 nm). 10  $\mu$ L of 100  $\mu$ M Nile  
762 Red (in DMSO) were dissolved into 200  $\mu$ L *H. akashiwo* culture supernatant and mixed thoroughly by  
763 vortexing the mixture. 200  $\mu$ L cells were added to the mixed NR stain aliquot (final concentration 2.4  $\mu$ M)  
764 and incubated in the dark at room temperature for 15 minutes. To identify and characterize the accumulation  
765 of LDs in single cells, we used phase contrast and fluorescence microscopy (Olympus CKX53 inverted  
766 microscope) supplemented with high-resolution color camera (Imaging Source, DFK33UX265). To avoid  
767 any photo-toxicity effect of light during cell analysis, excitation LED intensity (552 nm) was kept low and at  
768 a maximum value of 5. To extract the *H. akashiwo* 3107 cell area and both LD dimension (area and volume)  
769 and intracellular location, movies of single-cell were recorded at 16 frames per second for 5 seconds. We  
770 quantified the LD effective size assuming individual LDs to be a spherical droplet, and deriving the effective  
771 radius of individual LDs from the contour area extracted by thresholding the Images using in-house  
772 MATLAB image processing algorithms and Image J. From the individual LDs, the position of their net  
773 center of mass in single cells was determined with respect to the cell geometric center.

774 **Quantification of nucleus radius and intracellular localization.** To determine nucleus size and position,  
775 *H. akashiwo* 3107 cells were sampled from the culture tube at different time intervals representative of lag  
776 (60 hours), exponential (300 hours) and stationary (700 hours) growth stages, and stained with Syto9 Green  
777 Fluorescent Nucleic Acid Stain (ThermoFisher, excitation/emission 480/501 nm). 7.5  $\mu$ L Syto9 100  $\mu$ M (in  
778 DMSO) were dissolved into 300  $\mu$ L *H. akashiwo* 3107 cell supernatant and mixed thoroughly by vortexing.  
779 300  $\mu$ L cells were added to the mixed Syto9 stain aliquot (final concentration 1.2  $\mu$ M) and incubated in the  
780 dark at room temperature for 12 minutes. To quantify nucleus characteristics in single-cell *H. akashiwo*  
781 3107, we used phase contrast and fluorescence microscopy (Olympus CKX53 inverted microscope)  
782 supplemented with high-resolution color camera (Imaging Source, DFK33UX265). To avoid any photo-toxic  
783 effect of light during cell imaging, LED excitation intensity (480 nm) was kept low and at a maximum value  
784 of 5. To extract *H. akashiwo* 3107 nucleus radius and intracellular localization, movies of single-cell were  
785 recorded at 16 frames per second for 5 seconds. We derived the effective radius of the nucleus from the  
786 contour area extracted by thresholding and Image J image analysis. Relevant data on *H. akashiwo* 452 can be  
787 found in refs

788 **Pulse-amplitude modulated chlorophyll fluorometry (PAM) experiment.** PAM was used to evaluate and  
789 quantify the photophysiological efficiency of *H. akashiwo* cells at different time intervals during the  
790 exponential and stationary growth stages in diverse nutrient regimes. Multiple Excitation Wavelength  
791 Chlorophyll Fluorometer (Multi-Color-PAM; Heinz Walz GmbH, Effeltrich, Germany) was used to quantify  
792 the maximum photosynthetic quantum yield ( $F_v/F_m$ ), the maximum electron transport rate ( $ETR_{max}$ ) and  
793 nonphotochemical quenching (NPQ) of *H. akashiwo* cells at the population scale. For PAM measurements,  
794 culture tube was mixed through gently rotating the tube by 360°. 1200  $\mu$ L suspensions of plankton cells were  
795 sampled from the top 0.5 cm culture and placed into a quartz silica cuvette (Hellma absorption cuvettes,  
796 spectral range 200-2500 nm, path length 10mm). We used Multi-Color PAM 3 Win software saturation pulse  
797 (SP) and light curve method to quantify  $F_v/F_m$  and  $ETR_{max}$  at diverse time intervals, and under different  
798 nutrient regimes.

799

800 **Nutrient-starved phytoplankton biomechanical and physiological response to fresh nutrients.** Nutrient-  
801 depleted *H. akashiwo* cells from the stationary growth stage exhibit characteristic biomechanical and  
802 physiological properties (LD accumulation, motility and reduced photophysiology) that enables  
803 phytoplankton population to save energy and survive nutrient constraints. Cultures of *H. akashiwo* cells from  
804 stationary growth stage (700 h) were supplemented with low amount of fresh f/2(-Si) to evaluate and  
805 quantify phytoplankton biomechanical and physiological recovery efficiency during a short time interval of  
806 48 hours. 8 mL Late stationary cell cultures were reincorporated with (i) 1 mL C<sub>0</sub> f/2(-Si), (ii) 1 mL 10% C<sub>0</sub>  
807 f/2(-Si), (iii) control (no nutrient reincorporation). Total nutrients (nitrate and phosphate) concentrations per  
808 cell (quantified to stationary cell concentration of 10<sup>5</sup> cells mL<sup>-1</sup>) were estimated to be: NO<sub>3</sub><sup>-</sup>(i)~7×10<sup>-7</sup> μmol  
809 cell<sup>-1</sup>, (ii)~7×10<sup>-8</sup> μmol cell<sup>-1</sup>, (iii) 0 μmol cell<sup>-1</sup>; PO<sub>4</sub><sup>3-</sup> (i)~4.5×10<sup>-7</sup> μmol cell<sup>-1</sup>, (ii)~4.5×10<sup>-8</sup> μmol cell<sup>-1</sup>,(iii)  
810 0 μmol cell<sup>-1</sup>. After 24 hours of incubation at 22°C (14 hours light:10 hours dark),  $F_v/F_m$ ,  $ETR_{max}$ , total LDs  
811 volume per cell, motility and ROS were quantified (as described previously) to determine recuperation of *H.*  
812 *akashiwo* motility and physiological recovery efficiency.

813 **Quantification of nutrient concentration.** Analysis of nutrients, namely nitrate (NO<sub>3</sub><sup>-</sup>) and phosphate  
814 (PO<sub>4</sub><sup>3-</sup>) were performed colorimetrically using Prove600 Spectroquant (Merck). NO<sub>3</sub><sup>-</sup> was analyzed with  
815 Nitrate Cell Test in Seawater (Method: photometric 0.4 – 13.3 mg/l NO<sub>3</sub><sup>-</sup>Spectroquant®). The corresponding  
816 detection limit of NO<sub>3</sub><sup>-</sup> concentration measurable in our experiments is 6.45 μM. PO<sub>4</sub><sup>3-</sup> was analyzed with  
817 Phosphate Cell Test (Method: photometric 0.2 – 15.3 mg/l PO<sub>4</sub><sup>3-</sup>Spectroquant®, with corresponding  
818 detection limit of 2 μM). Experimental values below the respective detection limits is taken as zero.

819 **Statistical analysis.** We performed one-way ANOVA to compare the total lipid droplet volume  
820 accumulation in single *H. akashiwo* 3107 among different time intervals from exponential to stationary  
821 growth stage. We made multiple comparisons using a post-hoc Tukey's HSD test. Same multiple comparison  
822 statistical analysis was conducted to compare phytoplankton speed and photophysiological parameters  
823 among different time interval samples representative of the exponential and stationary growth stages. Same  
824 statistical analysis was conducted in the *nutrient recovery experiment* to compare photophysiological  
825 efficiency, LDs volume, motility and ROS among the still (control, no nutrients) and cells supplemented  
826 with fresh f/2(-Si) after 24 hours of incubation.

827 **MSD Estimation.** The proper quantification of ballistic motility is ensured through a rigorous cell-tracking  
828 followed by mean squared displacement (MSD) analysis. For the analysis of MSD and the corresponding  
829 velocity correlations (insights and details in the main draft), we closely follow the procedures in (64). The  
830 package @msdalyzer is modified and used in MATLAB to obtain the MSD curves for 60 hours, 300 hours  
831 and 700 hours culture age. The log-log representation of the MSD plots can be fitted with a linear function,  
832 that is,  $\log(\langle r^2 \rangle) = \Gamma + \alpha \log(t)$  where the exponent  $\alpha$  provides the information whether the flow is diffusive  
833 ( $\alpha \sim 1$ ); ballistic motion / active transport / super-diffusive ( $\alpha \sim 1.5-2$ ) or constrained transport ( $\alpha < 0.9$ ) in  
834 nature. To obtain the exponents, we clip the MSD plots until where the phytoplankton cells do not feel the  
835 confinement effect.

836 **Cell mechanics model and phase plot.** To understand the cell stability, dead and active torque and cell  
837 reorientation timescale (as obtained from experiments), we propose a reduced-order model for the cell  
838 mechanics. Here we talk in terms of force and torque balance on the phytoplankton cell and attempt to  
839 decipher the effect of lipid formation on the cell stability and rotational kinetics. The focus of the discussion  
840 is to identify the relevant forces and torques a motile cell would encounter. A cell experiences a propulsion  
841 ( $P$ ) attributed to the drive from its flagella, the weight of its own body which can be segregated into weight  
842 from its nucleus, lipids and cytoplasm, an upthrust due to its density being not equal to the surrounding fluid  
843 and a drag force attributed to the viscous effects. The relevant torques about its center of buoyancy will  
844 include one from nucleus and lipids (if they do not reside on the major axis of the cell), torque due to viscous  
845 drag and torque induced due to translational drag for asymmetric cells (48). With these considerations, we  
846 formulate the overall force and torque balance in each component as follows:



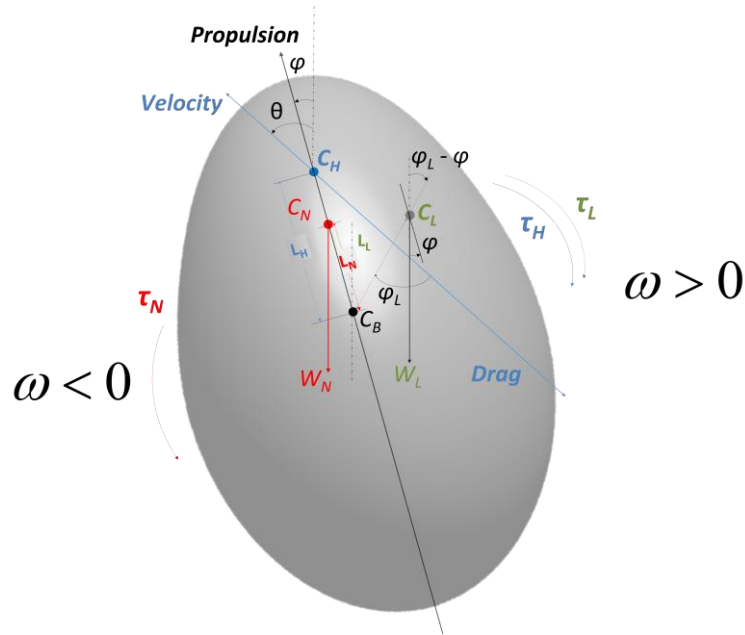

847 **Figure M1.** Schematics of the geometry of the single-cell of the phytoplankton along with the free body diagram of all  
 848 forces and torques.  
 849

$$P \sin \varphi = D \sin \theta$$

$$850 \quad P \cos \varphi - D \cos \theta = (\rho_{\text{cyt}} - \rho_{\text{fluid}}) V_C g + (\rho_N - \rho_{\text{cyt}}) V_N g + (\rho_L - \rho_{\text{cyt}}) V_L g \quad (1)$$

$$D \sin(\theta - \varphi) L_H - W_N \sin(\varphi_N) L_N - W_L \sin(\varphi - \varphi_L) L_L = R \eta \omega$$

851  
 852 Here  $\rho$ ,  $L$ ,  $V$  and  $\eta$  denotes the density, distance from cell centroid, volume, and medium viscosity  
 853 respectively. The subscripts  $C$ ,  $\text{cyt}$ ,  $\text{fluid}$ ,  $N$ ,  $L$  and  $H$  refers to the cell, cytoplasm, background medium,  
 854 nucleus, lipids and the hydrodynamic center of the cell, respectively.  $\varphi_N$  is the angle between the direction of  
 855 gravity (vertical line) and the line joining  $C_N$  and  $C_B$  while  $\varphi_L$  is the angle between the major axis and the  
 856 line joining  $C_L$  and  $C_B$ .  $\varphi$  is the angle of the cell propulsion axis (resultant flagellar motion) and the vertical  
 857 axis, which is an unknown along with the propulsion force  $\mathbf{P}$ . Such definitions of the angles make them  
 858 independent of the initial angular position of the cell and dependent on  $\varphi$ , which comes as a part of our from  
 859 of equation (1). Since we assume the center of gravity of the nucleus to lie on the major axis, an assumption  
 860 experimentally very close to, therefore  $\varphi_N = \varphi$ . Realistically, a cell does not move exactly in the direction of  
 861 propulsion and is assumed to move at an offset making an angle  $\theta$ , a known parameter obtainable from  
 862 experiments, with the vertical. In the above configuration, counter clockwise angular direction from the  
 863 vertical line (direction of gravity) is assumed to be positive. The terms  $W_L$  and  $W_N$  are the weight of the lipids  
 864 and the nucleus with respect to the cytoplasm.  $D$  is the drag force described below,  $P$  is the force of  
 865 propulsion which is unknown and is obtained from solving equations set (1). The cell is described by the  
 866 generic equation  $r = \frac{abc}{\sqrt{c^2(b^2 \cos^2 \gamma + a^2 \sin^2 \gamma) \cos^2 \psi + a^2 b^2 \sin^2 \psi}}$  where  $a$ ,  $b$  ( $a > b$ ),  $c$  ( $=b$ ),  $\gamma$  ( $0 < \gamma < 2\pi$ ) and  $\psi$

867 ( $-\pi/2 < \psi < \pi/2$ ) respectively denotes the major axis length, semi-major axis length, minor axis length,  
 868 azimuth angle and polar angle. The symmetric geometry implies that the hydrodynamic center of the cell is  
 869 on the cell centroid (centre of buoyancy) and  $L_H$  vanishes (48). Finally,  $R$  represent the coefficient of  
 870 hydrodynamic rotational resistance on the phytoplankton cell. To obtain the cell dimensions, we have fitted  
 871 the phase contrast microscopy images to the cell profile using above equation and imposing  $\gamma = 0$ , thereby  
 872 obtaining a 2D version of the parametric equation of the form  $r = \frac{ab}{\sqrt{b^2 \cos^2 \psi + a^2 \sin^2 \psi}}$  (65). The cell being

873 assumed symmetric prolate ellipsoid, coefficient of resistance  $R$  and the drag, expressed as  $D_{\parallel, \perp} = 6\pi\eta r_{\text{eq}} U K_{\parallel, \perp}$   
 874 where  $U$  is the translational velocity and  $K$  denotes the shape factor, are re-derived for our case (66, 67) with

875  $t=a/b$ . The viscous torque drag can be estimated using  $\tau = R\eta\omega$  where  $\omega$  is the angular velocity. All the  
 876 meaning of the rest of the symbols is geometrically explained in the above model geometry. This set of three  
 877 equations have three unknowns namely  $P$ ,  $\phi$  and  $\omega$ . The solution we are interested is in finding the angular  
 878 rotation rate  $\omega$ . Thus, from all the values known from the experiments across different growth stage, we  
 879 attempt to draw a phase plot (represented in Figure 4E-G) that reflects the value of the angular rotation rate  
 880 as a function of the different possible position (varying  $\phi_L$  and  $L_L$ ) a representative LD of dimensions  
 881 corresponding to a particular growth stage can take within a cell. The phase plots highlight the stability of the  
 882 cell that has contribution from various factors. With nucleus remaining very close to the geometric center,  
 883 the dominant factor to impart the stability criterion to the strain S-1 cells is the lipid compartmentalization  
 884 effects.

885 The active torque can now be estimated in a straight-forward manner from last equation of set (1) with  
 886 unbalanced torque expression. Note that for any general ellipsoid, the drag force  $D$  applied by an arbitrary  
 887 ellipsoid, with semi-axis lengths  $\{k, m, n\}$ , on the fluid when translating at speed  $U$  in the  $k$  direction, is

888  $\frac{D}{\pi\eta U} = \frac{16}{\phi + \zeta_k k^2}$ , while the torque applied on a fluid due to rotation with rate  $\omega$  around the  $k$  direction is

889  $R = \frac{\tau}{\pi\eta\omega} = \frac{16}{3} \frac{m^2 + n^2}{m^2\zeta_m + n^2\zeta_n}$  (68) where the variables in the relation is given by

890  $\zeta_{k,m,n} = \int_0^\infty dx' \frac{1}{((k,m,n)^2 + x')\sqrt{(k^2 + x')(m^2 + x')(n^2 + x')}}}$  (with  $k, m,$  and  $n$  denoting individual

891 relations for  $\zeta_k, \zeta_m$  and  $\zeta_n$ , respectively) and  $\phi = \int_0^\infty dx' \frac{1}{\sqrt{(k^2 + x')(m^2 + x')(n^2 + x')}}}$ .  $R = R$  for

892 axially symmetric shape about the major axis. We have estimated the integrals using MATLAB and matched  
 893 with the asymptotic analytical expression for axially symmetric spheroid (prolate). The active torque is  
 894 plotted as a function of different ratios of the shortest axis ( $c$ ) and major axis ( $a$ ), different ratios of the lipid  
 895 volume by cell volume and different ratios of the lipid distance from the cell geometric centre to major axis  
 896 of the cell. All other factors for strain S-1 and S-2 are kept same for comparison of the required active  
 897 torque.

898 **Reorientation analysis in the dynamic experimental setup.** The swimming stability of *H. akashiwo* 3107  
 899 and 452 strains was quantified for two time points representative of exponential (72 h) and stationary (700 h)  
 900 growth stages. Experiments were conducted in rectangular millifluidic chamber (10 mm x 3.3 mm x 2 mm)  
 901 made of PPMA (Poly methyl methacrylate) with ~1.6 mm inlet and outlet circular holes located at the edges  
 902 of chamber opposite to each other. The chamber was mounted via magnets on a circular plate which is, in  
 903 turn, attached to a custom-made holding cage that include light diffuser (220 grits) and a red LED (630 nm  
 904 wavelength). The different components in the cage are placed in a way to permit homogenous lit of the  
 905 interested chamber area. One end of the entire cage is connected to the shaft of a stepper motor that permits  
 906 the rotation of the whole setup as needed. The Nema 23 stepper motor was controlled automatically using a  
 907 DM452T driver coupled to an Arduino uno board. The automation part comes from programming the  
 908 Arduino to rotate by a specific degree for a specific duration. On the other end of the cage, a variable zoom  
 909 lens system (zoom = 1.7x) was connected to a Grasshopper3 (Model: GS3-U3-41C6C-C) camera with a 1''  
 910 sensor that permits to capture the entire vertical height of the chamber. The geometric center of the chamber,  
 911 light source and diffuser were placed in coaxial position. For imaging, the focal plane was chosen visually to  
 912 be in the middle of the experimental millifluidic chamber.

913 Prior to image acquisition, concentration of cells in the measured sample was adapted to permit single-cell  
 914 tracking and quantification of corresponding reorientational stability (48). Due to low cell density, no  
 915 dilution was required at 72 hours. During late stationary stages, the cell cultures were diluted in a glass vial  
 916 supplemented with 3.4 mL of 0.45  $\mu$ m filtered culture supernatant collected from the bottom of the  
 917 experimental culture tube using a 120 mm needle and 2 mL syringe. 1.2 mL cell culture collected from the  
 918 top 5 mm tube were gently added in the filtered supernatant volume to reach a 3.8x final dilution. The glass  
 919 vial with the cell dilution was covered with parafilm with multiple holes done using small needle to allow  
 920 airflow, and placed in the incubator at 22°C for 50 minutes to allow cells acclimatization. We conducted two

921 biological replicates with three technical and three technical replicates, numbering a total of 18 replicates for  
922 each of the two strains analyzed. Millifluidic chamber was filled by gently pipetting suspension of  
923 phytoplankton cells (180  $\mu$ L) sampled from the top 0.5 cm culture followed by closing the inlet and outlet  
924 ports with a silicone plug and mounting it on the magnetic cage. A wait time of 20 minutes was given so that  
925 cells distributed in the most stable configuration in the millifluidic chamber. Afterward, a 180-degree  
926 rotation was applied to the chamber through the Arduino controlled automatic stepper motor (programmed  
927 in-house). Once cells swam to the middle of the chamber, we applied a series of three consecutive flips with  
928 intervals of 15, 12, 12 seconds for cells at 72 hours, and 25, 20, 20 seconds for cells at 700 hours. The  
929 different waiting periods were adapted in light of the growth stage-dependent reorientation speeds (speed at  
930 stationary stage is lower than speed at exponential stage, Figure 3). Videos were acquired at 16 frames per  
931 second. Phytoplankton cells were tracked using Image J plugin Mosaic Particle Tracker (2D/3D), and  
932 analyzed using in-house Python codes. We analyzed 160 frames and 220 frames for populations at 72 and  
933 700 hours, respectively. The corresponding swimming times of 10 and 14 seconds were sufficient to capture  
934 multiple cell reorientation events in each replicate. Among the acquired trajectories, those which appear for  
935 less than 45 frames, or those which showed a net displacement less than 10 pixels (corresponding to 20  $\mu$ m,  
936 one cell body length) were eliminated. The remaining trajectories were interpolated quadratically  
937 (smoothing). For single trajectory, angular velocity ( $\omega$ ) was obtained for each consecutive frame as a  
938 function of the instantaneous angular position ( $\theta$ ). Angular velocities were averaged for given  $\theta$  value  
939 (ranging from -90 to 90 degrees, binned at intervals of 10 degrees). Any  $\omega$  value greater than 0.5 rad/sec or  
940 less than -0.5 rad/sec was eliminated. Obtained  $\omega$  values were fitted to a sinusoidal curve of the form  $A \times$   
941  $\sin(x)$ , and the reorientation timescale was then obtained as  $B = \frac{1}{2A}$ .

942

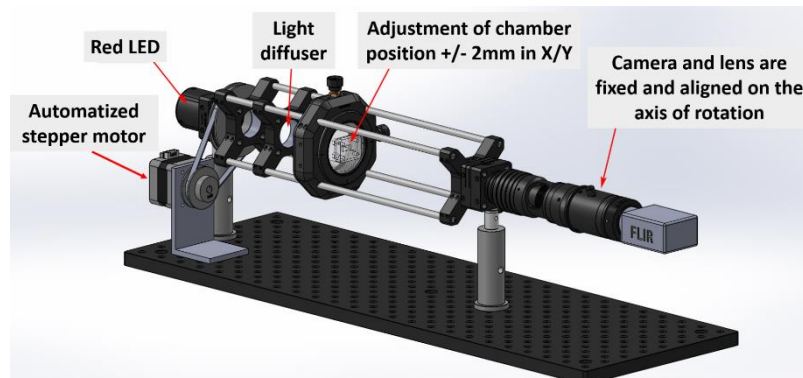

943

944 **Figure M2.** Schematic of the microscopic imaging system that is used to find the reorientation time scale of the  
945 phytoplankton population.

946

947 **Quantification of endogenous cellular stress.** Endogenous reactive oxygen species (ROS) were quantified  
948 with the fluorescent stain CellROX Orange (Thermofisher, excitation/emission 545/565 nm) to determine  
949 impact of nutrient limitation on ROS production. CellROX Orange is a cell-permeable reagent non-  
950 fluorescent while in a reduced state and upon oxidation exhibits strong fluorogenic signal. *H. akashiwo* cells  
951 sampled at different nutrient regimes were incubated with 5  $\mu$ M CellROX Orange for 30 minutes in the dark  
952 (400  $\mu$ L cells with 0.6  $\mu$ L CellROX ready-to-use stock solution). After incubation, cells were illuminated  
953 using green light ( $\sim$ 545 nm) with an exposure time of 1/5, and an LED fluorescence intensity of 100%. The  
954 fluorescence readout was quantified over 21 seconds using fluorescence microscopy (Olympus CKX53  
955 inverted microscope) supplemented with high-resolution color camera (Imaging Source, DFK33UX265). For  
956 single cell, the fluorescence intensity is increased over time; the magnitude of fluorescence intensity before  
957 cell lysis corresponded to the maximum ROS accumulation in the cell. For quantification, acquired single-  
958 cell fluorescence image was analyzed with ImageJ Z-stack layer to extract time-dependent signal intensity  
959 variation. Stress accumulation rate, quantified as fluorescence intensity signal, was integrated over the first  
960 10 seconds of acquisition.
